# Supplementary material for: Yersinia pestis: New Evidence for an Old Infection
Source: PLoS One. 2012 Nov 28;7(11):e49803. doi: 10.1371/journal.pone.0049803 (PMC3509097; doi:10.1371/journal.pone.0049803)
Supplement: Table S1 — Sequence data for all SNPs generated from the intersection of the Bos et al. [1] and Morelli et al. [3] datasets. Table S1a shows those retained by the 95% partial deletion filter in MEGA 5, and Table S1b shows those removed by the filter. (XLSX) [file pone.0049803.s002.xlsx]

## Sheet: Table S1a
Table S1a
SNPs for the intersection of the Morelli et al. and Bos et al. datasets retained by the 95% partial deletion filter
CO92_POS	1166	6103	22702	22948	54102	65361	70649	71105	74539	79379	84787	90183	97226	98534	98835	126977	130643	139466	143347	155747	166484	167652	178028	179896	185039	195048	195147	196232	203665	213227	215610	228268	228831	242986	252309	274360	278372	282762	289157	290202	309324	325836	333394	335833	341543	341720	348092	356311	358397
E. Smith.	G	C	C	C	A	G	C	C	A	T	A	A	C	G	G	A	T	C	G	C	G	T	C	G	C	C	C	T	T	A	C	T	C	A	G	C	C	C	?	A	?	G	A	G	T	A	G	C	G
NC_003143	G	C	C	C	A	G	C	C	G	T	A	A	C	G	G	A	C	C	G	T	G	T	C	G	C	C	C	T	T	A	C	T	C	A	G	C	C	C	C	A	C	A	A	G	T	A	G	C	G
NC_004088	G	C	C	C	A	G	C	C	A	T	A	A	T	A	G	A	T	C	G	C	G	T	C	T	C	C	C	T	C	A	C	T	C	A	A	C	C	T	C	A	C	G	A	A	T	A	G	C	G
NC_005810	G	C	T	A	A	T	C	A	A	T	A	A	C	G	A	G	T	C	G	C	G	T	C	G	T	C	C	T	T	T	C	T	C	A	G	C	C	C	C	C	C	G	A	G	T	G	G	A	A
NC_006155	G	C	T	A	A	G	C	C	A	C	A	A	C	A	G	?	T	C	G	C	G	T	C	G	C	C	T	T	T	T	C	G	C	A	G	C	C	C	C	A	C	G	A	G	C	G	G	C	G
NC_008149	G	C	C	C	A	G	C	C	A	T	A	A	T	G	G	A	T	C	G	C	G	T	C	G	C	C	C	T	T	A	C	T	C	A	G	C	C	T	C	A	C	G	A	A	T	A	G	C	G
NC_008150	A	C	C	C	T	G	C	C	A	T	A	A	C	G	G	A	T	C	G	C	G	T	T	G	C	C	C	T	T	A	C	T	C	A	G	T	C	C	C	A	T	A	A	G	T	A	G	C	G
NC_009381	G	T	T	A	A	G	T	C	A	C	T	G	C	G	G	G	T	T	T	C	G	C	C	G	C	T	T	G	T	T	A	G	T	G	G	C	C	C	T	A	C	G	G	G	C	G	T	C	G
NC_009708	G	C	T	A	A	G	C	C	A	C	A	A	C	A	G	?	T	C	G	C	G	T	C	G	C	C	T	T	T	T	C	G	C	A	G	C	C	C	C	A	C	G	A	G	C	G	G	C	G
NC_010159	G	C	T	A	A	G	C	C	A	T	A	A	C	G	G	G	T	C	G	C	G	T	C	G	C	C	C	G	T	T	C	G	C	A	G	C	C	C	C	A	C	G	A	G	T	G	G	C	G
NC_014029	G	C	C	C	A	G	C	C	A	T	A	A	C	G	G	A	C	C	G	T	G	T	C	G	C	C	C	T	T	A	C	T	C	A	G	C	C	C	C	A	C	A	A	G	T	A	G	C	G
NZ_AAOS02000	G	C	C	C	A	G	C	C	A	T	A	A	C	G	G	A	C	C	G	T	G	T	C	G	C	C	C	T	T	?	?	T	C	A	G	C	T	C	C	A	C	A	A	G	T	A	G	C	G
NZ_AAUB01000	G	C	C	C	A	G	C	C	G	T	A	A	C	G	G	A	C	C	G	T	G	T	C	G	C	?	?	T	T	?	?	?	?	A	G	C	C	C	C	A	C	A	A	G	T	A	G	C	G
NZ_AAYR01000	A	C	C	C	T	G	C	C	A	T	A	A	C	G	G	A	T	C	G	C	G	T	T	G	C	C	C	T	T	A	C	T	C	A	G	T	C	C	C	A	T	A	A	G	T	A	G	C	G
NZ_AAYS01000	G	C	C	C	A	G	C	C	A	T	A	A	C	G	G	A	C	C	G	T	G	T	C	G	C	C	C	T	T	?	?	T	C	A	G	C	C	C	C	A	C	A	A	G	T	A	G	C	G
NZ_AAYT01000	G	C	C	C	A	G	C	C	A	T	A	A	T	G	G	A	T	C	G	C	G	T	C	T	C	C	C	T	C	A	C	T	C	A	G	C	C	T	C	A	C	G	A	A	T	A	G	C	G
NZ_AAYU01000	G	C	C	C	A	G	C	C	A	T	A	A	C	G	G	A	T	C	G	C	G	T	C	G	C	C	C	T	T	A	C	T	C	A	G	C	C	C	C	A	C	G	A	G	T	A	G	C	G
NZ_AAYV01000	G	C	C	C	A	G	C	C	A	T	A	A	C	G	G	A	C	C	G	T	A	T	C	G	C	C	C	T	T	A	C	T	C	A	G	C	C	C	C	A	C	A	A	G	T	A	G	C	G
NZ_ABAT01000	G	C	C	C	A	G	C	C	A	T	A	A	C	G	G	A	C	C	G	T	G	T	C	G	C	C	C	T	T	A	C	T	C	A	G	C	C	C	C	A	C	A	A	G	T	A	G	C	G
NZ_ABCD01000	G	C	C	C	A	G	C	C	G	T	A	A	C	G	G	A	C	C	G	T	G	T	C	G	C	C	C	T	T	A	C	T	C	A	G	C	C	C	C	A	C	A	A	G	T	A	G	C	G
NZ_ACNQ01000	G	C	C	C	A	G	C	C	A	T	A	A	T	G	G	A	T	C	G	C	G	T	C	G	C	C	C	T	T	A	C	T	C	A	G	C	C	T	C	A	C	G	A	A	T	A	G	C	G
NZ_ACNS01000	G	C	C	C	A	G	C	C	A	T	A	A	C	G	G	A	C	C	G	T	G	T	C	G	C	C	C	T	T	A	C	T	C	A	G	C	C	C	C	A	C	A	A	G	T	A	G	C	G
B2003003	G	C	C	C	A	G	C	C	A	T	A	A	C	G	G	A	T	C	G	C	G	T	C	G	C	C	C	T	T	A	C	T	C	A	G	C	C	C	C	A	C	G	A	G	T	A	G	C	G
E1979001	G	C	C	C	A	G	C	C	A	T	A	A	C	G	G	A	C	C	G	T	A	T	C	G	C	C	C	T	T	A	C	T	C	A	G	C	C	C	C	A	C	A	A	G	T	A	G	C	G
F1991016	G	C	C	C	A	G	C	C	A	T	A	A	C	G	G	A	C	C	G	T	G	T	C	G	C	C	C	T	T	A	C	T	C	A	G	C	C	C	C	A	C	A	A	G	T	A	G	C	G
K1973002	G	C	C	C	A	G	C	C	A	T	A	A	T	G	G	A	T	C	G	C	G	T	C	T	C	C	C	T	C	A	C	T	C	A	G	C	C	T	C	A	C	G	A	A	T	A	G	C	G
1107	G	C	C	C	A	G	C	C	A	T	A	A	C	G	G	A	C	C	G	T	G	T	C	G	C	C	C	T	T	A	C	T	C	A	G	C	C	C	C	A	C	A	A	G	T	A	G	C	G
1220	G	C	C	C	A	G	C	C	A	T	A	A	C	G	G	A	C	C	G	T	G	T	C	G	C	C	C	T	T	A	C	T	C	A	G	C	C	C	C	A	C	A	A	G	T	A	G	C	G
1221	G	C	C	C	A	G	?	C	A	T	A	A	C	G	G	A	C	C	G	T	G	?	C	?	C	C	C	T	T	A	C	T	C	A	?	C	C	C	C	A	C	A	A	G	T	A	G	C	G
1268	G	C	C	C	A	G	C	C	A	T	A	A	C	G	G	A	C	C	G	T	G	T	C	G	C	C	?	T	T	A	C	T	C	A	G	?	C	C	C	A	C	A	A	G	T	A	G	C	G
1283	G	C	C	C	A	G	C	C	A	T	A	A	C	G	G	A	C	C	G	T	G	T	C	G	C	C	C	T	T	A	C	T	C	A	G	C	C	C	C	A	C	A	A	G	T	A	G	C	G
1284	G	C	C	C	A	G	C	C	A	T	A	A	C	G	G	A	C	C	G	T	G	T	C	G	C	C	C	T	T	A	C	T	C	A	G	C	C	C	C	A	C	A	A	G	T	A	G	C	G
1285	G	C	C	C	A	G	C	C	A	T	A	A	C	G	G	A	C	C	G	T	G	T	C	G	C	C	C	T	T	A	C	T	C	A	G	C	C	C	C	A	C	A	A	G	T	A	G	C	G
1286	G	C	C	C	A	G	C	C	A	T	A	A	C	G	G	A	C	C	G	T	G	T	C	G	C	C	C	T	T	A	C	T	C	A	G	C	C	C	C	A	C	A	A	G	T	A	G	C	G
1287	G	?	C	C	A	G	C	C	A	T	?	A	C	G	G	A	C	C	G	T	G	T	C	G	C	C	C	T	T	A	C	T	C	A	G	C	C	C	C	A	C	A	A	G	T	A	G	C	G
1288	G	C	C	C	A	G	C	C	A	T	A	A	C	G	G	A	C	C	G	T	G	T	C	G	C	C	C	T	T	A	C	T	C	A	G	C	C	C	C	A	C	A	A	G	T	A	G	C	G
1289	G	C	C	C	A	G	C	C	A	T	A	A	C	G	G	A	C	C	G	T	G	T	C	G	C	C	C	T	T	A	C	T	C	A	G	C	C	C	C	A	C	A	A	G	T	A	G	C	G
1290	G	C	C	C	A	G	C	C	A	T	A	A	C	G	G	A	C	C	G	T	G	T	C	G	C	C	C	T	T	A	C	T	C	A	G	C	C	C	C	A	C	A	A	G	T	A	G	C	G
1291	G	C	C	C	A	G	C	C	A	T	A	A	C	G	G	A	C	C	G	T	G	T	C	G	C	C	C	T	T	A	C	T	C	A	G	C	C	C	C	A	C	A	A	G	T	A	G	C	G
1292	G	C	C	C	A	G	C	C	A	T	A	A	C	G	G	A	C	C	G	T	G	T	C	G	C	C	C	T	T	A	C	T	C	A	G	C	C	C	C	A	C	A	A	G	T	A	G	C	G
1294	G	C	C	C	A	G	C	C	A	T	A	A	C	G	G	A	C	C	G	T	G	T	C	G	C	C	C	T	T	A	C	T	C	A	G	C	C	C	C	A	C	A	A	G	T	A	G	C	G
1296	G	C	C	C	A	G	C	C	A	T	A	A	C	G	G	A	C	C	G	T	G	T	C	G	C	C	C	T	T	A	C	T	C	A	G	C	C	C	C	A	C	A	A	G	T	A	G	C	G
1297	G	C	C	C	A	G	C	C	A	T	A	A	C	G	G	A	C	C	G	T	G	T	C	G	C	C	C	T	T	A	C	T	C	A	G	C	C	C	C	A	C	A	A	G	T	A	G	C	G
1309	?	C	C	C	A	G	C	C	A	T	A	A	C	G	G	A	C	C	G	T	G	T	C	G	C	C	C	T	T	A	C	T	C	A	G	C	C	C	C	A	C	A	A	G	T	A	G	C	G
1322	G	C	C	C	A	G	C	C	A	T	A	A	C	G	G	A	C	C	G	T	G	T	C	G	C	C	C	T	T	A	C	T	C	A	G	C	C	C	C	A	C	A	A	G	T	A	G	C	G
1324	G	C	C	C	A	G	C	C	?	T	A	A	C	G	G	A	C	C	G	T	G	T	C	G	C	C	C	T	T	A	C	T	C	A	G	C	C	C	C	A	C	A	A	G	T	A	G	C	G
1339	G	C	C	C	A	G	C	C	A	T	A	A	C	G	G	A	C	C	G	T	G	T	C	G	C	C	C	T	T	A	C	T	C	A	G	C	C	C	C	A	C	A	A	G	T	A	G	C	G
1343	G	C	C	C	A	G	C	C	A	T	A	A	C	G	G	A	C	C	G	T	G	T	C	G	C	C	C	T	T	A	C	T	C	A	G	C	C	C	C	A	C	A	A	G	T	A	G	C	G
1344	G	C	C	C	A	G	C	C	A	T	A	A	C	G	G	A	C	C	G	T	G	T	C	G	C	C	C	T	T	A	C	T	C	A	G	C	C	C	?	A	C	A	A	G	T	A	G	C	G
1349	G	C	C	C	A	G	C	C	A	T	A	A	C	G	G	A	C	C	G	T	G	T	C	G	C	C	C	T	T	A	C	T	C	A	G	C	C	C	C	A	C	A	A	G	T	A	G	C	G
1361	G	C	C	C	A	G	C	C	A	T	A	A	C	G	G	A	C	C	G	T	G	T	C	G	C	C	C	T	T	A	C	T	C	A	G	C	C	C	C	A	C	A	A	G	T	A	G	C	G
1369	G	C	C	C	A	G	C	C	A	T	A	A	C	G	G	A	C	C	G	T	G	T	C	G	C	C	C	T	T	A	C	T	C	A	G	C	C	C	C	A	C	A	A	G	T	A	G	C	G
1464	G	C	C	C	A	G	C	C	A	T	A	A	C	G	G	A	C	C	G	T	G	T	C	G	C	C	C	T	T	A	C	T	C	A	G	C	C	C	C	A	C	A	A	G	T	A	G	C	G
1478	G	?	C	C	A	G	C	C	A	T	?	A	C	G	G	A	C	C	G	T	G	T	C	G	C	C	C	T	T	A	C	T	C	A	G	C	C	C	C	A	C	A	A	G	T	A	G	C	G
1484	G	C	C	C	A	G	C	C	A	T	A	A	C	G	G	A	C	C	G	T	G	T	C	G	C	C	C	T	T	A	C	T	C	A	G	C	C	C	C	A	C	A	A	G	T	A	G	C	G
1488	G	C	C	C	A	G	C	C	A	T	A	A	C	G	G	A	C	C	G	T	G	T	C	G	C	C	C	T	T	A	C	T	C	A	G	C	C	C	C	A	C	A	A	G	T	A	G	C	G
1489	G	C	C	C	A	G	C	C	A	T	A	A	C	G	G	A	C	C	G	T	G	T	C	G	C	C	C	T	T	A	C	T	C	A	G	C	C	C	C	A	C	A	A	G	T	A	G	C	G
1490	G	C	C	C	A	G	C	C	A	T	A	A	C	G	G	A	C	C	G	T	G	T	C	G	C	C	C	T	T	A	C	T	C	A	G	C	C	C	C	A	C	A	A	G	T	A	G	C	G
1492	G	C	C	C	A	G	C	C	A	T	A	A	C	G	G	A	C	C	G	T	G	T	C	G	C	C	C	T	T	A	C	T	C	A	G	C	C	C	C	A	C	A	A	G	T	A	G	C	G
1494	G	C	C	C	A	G	C	C	A	T	A	A	C	G	G	A	C	C	G	T	G	T	C	G	C	C	C	T	T	A	C	T	C	A	G	C	C	C	C	A	C	A	A	G	T	A	G	C	G
1496	G	C	C	C	A	G	C	C	A	T	A	A	C	G	G	A	C	C	G	T	G	T	C	G	C	C	C	T	T	A	C	T	C	A	G	C	C	C	C	A	C	A	A	G	T	A	G	C	G
1497	G	?	C	C	A	G	C	C	A	T	?	A	C	G	G	A	C	C	G	T	G	T	C	G	C	C	C	T	T	A	C	T	C	A	G	C	C	C	C	A	C	A	A	G	T	A	G	C	G
1498	G	C	C	C	A	G	C	C	A	T	A	A	C	G	G	A	C	C	G	T	G	T	C	G	C	C	C	T	T	A	C	T	C	A	G	C	C	C	C	A	C	A	A	G	T	A	G	C	G
1510	G	C	C	C	A	G	C	C	A	T	A	A	C	G	G	A	C	C	G	T	G	T	C	G	C	C	C	T	T	A	C	T	C	A	G	C	C	C	C	A	C	A	A	G	T	A	G	C	G
1511	G	C	C	C	A	G	C	C	A	T	A	A	C	G	G	A	C	C	G	T	G	T	C	G	C	C	C	T	T	A	C	T	C	A	G	C	C	C	C	A	C	A	A	G	T	A	G	C	G
1512	G	C	C	C	A	G	C	C	A	T	A	A	C	G	G	A	C	C	G	T	G	T	C	G	C	C	C	T	T	A	C	T	C	A	G	C	C	C	C	A	C	A	A	G	T	A	G	C	G
1513	G	C	C	C	A	G	C	C	A	T	A	A	C	G	G	A	C	C	G	T	G	T	C	G	C	C	C	T	T	A	C	T	C	A	G	C	C	C	C	A	C	A	A	G	T	A	G	C	G
1514	G	C	C	C	A	G	C	C	A	T	A	A	C	G	G	A	C	C	G	T	G	T	C	G	C	C	C	T	T	A	C	T	C	A	G	C	C	C	C	A	C	A	A	G	T	A	G	C	G
1521	G	C	C	?	?	?	?	?	A	T	A	A	C	?	G	A	C	C	G	T	G	?	C	?	C	C	C	T	T	A	C	T	C	A	?	C	C	C	C	A	C	A	A	G	T	A	G	C	G
1522	G	C	C	C	A	G	C	C	A	T	A	A	C	G	G	A	C	C	G	T	G	T	C	G	C	C	C	T	T	A	C	T	C	A	G	C	C	C	C	A	C	A	A	G	T	A	G	C	G
1535	G	C	C	?	?	?	C	?	A	T	A	A	C	?	G	A	C	C	G	T	G	T	C	G	C	C	C	T	T	A	C	T	C	A	G	C	C	C	C	A	C	A	A	G	T	A	G	C	G
1537	G	C	C	C	A	G	C	C	A	T	A	A	C	G	G	A	C	C	G	T	G	T	C	G	C	C	C	T	T	A	C	T	C	A	G	C	C	C	C	A	C	A	A	G	T	A	G	C	G
1538	G	C	C	C	A	G	C	C	A	T	A	A	C	G	G	A	C	C	G	T	G	T	C	G	C	C	C	T	T	A	C	T	C	A	G	C	C	C	C	A	C	A	A	G	T	A	G	C	G
1540	G	C	C	C	A	G	C	C	A	T	A	A	C	G	G	A	C	C	G	T	G	T	C	G	C	C	C	T	T	A	C	T	C	A	G	C	C	C	C	A	C	A	A	G	T	A	G	C	G
1541	G	C	C	C	A	G	C	C	A	T	A	A	C	G	G	A	C	C	G	T	G	T	C	G	C	C	C	T	T	A	C	T	C	A	G	C	C	C	C	A	C	A	A	G	T	A	G	C	G
1554	G	C	C	C	A	G	C	C	A	T	A	A	C	G	G	A	C	C	G	T	G	T	C	G	C	C	C	T	T	A	C	T	C	A	G	C	C	C	C	A	C	A	A	G	T	A	G	C	G
1588	G	C	C	C	A	G	C	C	A	T	A	A	C	G	G	A	C	C	G	T	G	T	C	G	C	C	C	T	T	A	C	T	C	A	G	C	C	C	C	A	C	A	A	G	T	A	G	C	G
1589	G	C	C	C	A	G	C	C	A	T	A	A	C	G	G	A	C	C	G	T	G	T	C	G	C	C	C	T	T	A	C	T	C	A	G	C	C	C	C	A	C	A	A	G	T	A	G	C	G
1593	G	C	C	C	A	G	C	C	?	?	A	?	?	G	G	?	C	?	G	?	?	T	C	G	C	?	C	?	T	A	C	T	C	A	G	C	C	?	?	?	C	A	A	G	T	A	?	?	G
1594	G	C	C	C	A	G	C	?	A	T	A	A	T	A	G	A	T	C	G	C	G	T	C	T	C	C	C	?	C	A	C	T	C	A	A	C	C	T	C	A	C	G	A	A	T	A	G	C	G
1596	G	C	C	C	A	G	C	C	A	T	A	A	C	G	G	A	C	C	G	T	G	T	C	G	C	C	C	T	T	A	C	T	C	A	G	C	C	C	C	A	C	A	A	G	T	A	G	C	G
1599	G	C	C	C	A	G	C	C	A	?	A	A	C	G	G	A	C	C	G	?	G	T	C	G	C	C	C	T	T	A	C	T	C	A	G	C	C	?	?	A	C	A	A	G	T	A	G	C	G
1600	G	C	C	C	A	G	C	C	A	T	A	A	C	G	G	A	C	C	G	T	G	T	C	G	C	C	C	T	T	A	C	T	C	A	G	C	C	C	C	A	C	A	A	G	T	A	G	C	G
1601	G	C	C	C	A	G	C	C	A	T	A	A	C	G	G	A	C	C	G	T	G	T	C	G	C	C	C	T	T	A	C	T	C	A	G	C	C	C	C	A	C	A	A	G	T	A	G	C	G
1602	G	C	C	C	A	G	C	C	A	T	A	A	C	G	G	A	C	C	G	T	G	T	C	G	C	C	C	T	T	A	C	T	C	A	G	C	C	C	C	A	C	A	A	G	T	A	G	C	G
1633	G	C	C	C	A	G	C	C	A	T	A	A	C	G	G	A	C	C	G	T	G	T	C	G	C	C	C	T	T	A	C	T	C	A	G	C	C	C	C	A	C	A	A	G	T	A	G	C	G
1637	G	C	C	C	A	G	C	C	A	T	A	A	C	G	G	A	C	C	G	T	G	T	C	G	C	C	C	T	T	A	C	T	C	A	G	C	C	C	C	A	C	A	A	G	T	A	G	C	G
1697	G	?	C	C	A	G	C	C	?	?	?	?	C	G	G	?	C	C	G	?	G	T	C	G	C	?	C	T	T	A	C	T	C	A	G	C	C	?	?	A	C	A	A	G	T	A	G	C	G
1871	G	C	C	C	A	G	C	C	G	?	A	A	C	G	G	A	C	C	G	?	G	T	C	G	C	C	C	T	T	A	C	T	C	A	G	C	C	?	?	A	C	A	A	G	T	A	G	C	G
1872	G	C	C	C	A	G	C	C	G	T	A	A	C	G	G	A	C	C	G	T	G	T	C	G	C	C	C	T	T	A	C	T	C	A	G	C	C	C	C	A	C	A	A	G	T	A	?	?	G
1873	G	C	C	C	A	G	C	C	G	T	A	A	C	G	G	A	C	C	G	T	G	T	C	G	C	C	C	T	T	A	C	T	C	A	G	C	C	C	C	A	C	A	A	G	T	A	G	C	G
1874	G	C	C	C	A	G	C	C	G	T	A	A	C	G	G	A	C	C	G	T	G	T	C	G	C	C	C	T	T	A	C	T	C	A	G	C	C	C	C	A	C	A	A	G	T	A	G	C	G
1875	?	C	C	?	?	?	C	?	G	T	A	A	?	?	?	A	C	?	G	T	?	T	C	G	C	C	?	T	?	?	C	T	C	?	G	?	C	C	C	?	C	A	?	G	T	?	G	C	?
1893	?	C	C	?	?	?	C	?	A	T	A	A	C	?	G	A	C	C	G	T	G	T	C	G	C	C	C	T	?	?	C	T	C	?	G	C	C	C	C	A	C	A	?	G	T	?	G	C	G
1918	?	C	C	?	?	?	C	?	A	T	A	A	C	?	?	A	C	C	G	T	G	T	C	G	C	C	?	T	?	?	C	T	C	?	G	?	C	C	C	A	C	A	?	G	T	?	G	C	?
1919	G	C	C	C	A	G	C	C	G	T	A	A	C	G	G	A	C	C	G	T	G	T	C	G	C	C	C	T	?	?	C	T	C	?	G	C	C	C	C	A	C	A	?	G	T	?	G	C	G
1920	G	C	C	C	A	G	C	C	G	T	A	A	C	G	?	A	C	C	G	T	G	T	C	G	C	C	?	T	?	?	C	T	C	?	G	?	C	C	C	A	C	A	?	G	T	?	G	C	?
1970006	G	C	?	A	A	?	C	?	A	T	A	A	C	G	A	G	T	C	G	C	G	T	C	G	T	C	C	T	T	T	C	G	C	A	G	C	C	C	C	C	C	G	A	G	T	G	G	A	A
240	G	C	C	C	A	G	C	C	A	T	A	A	C	G	G	A	C	C	G	T	G	T	C	G	C	C	C	T	T	A	C	T	C	A	G	C	C	C	C	A	C	A	A	G	T	A	G	C	G
241	G	C	C	C	A	G	C	C	A	T	A	A	C	G	G	A	C	C	G	T	G	T	C	G	C	C	C	T	T	A	C	T	C	A	G	C	C	C	C	A	C	A	A	G	T	A	G	C	G
244	G	C	C	C	A	G	C	C	A	T	A	A	C	G	G	A	C	C	G	T	G	T	C	G	C	C	C	T	T	A	C	T	C	A	G	C	C	C	C	A	C	A	A	G	T	A	G	C	G
245	G	C	C	C	A	G	C	C	A	T	A	A	C	G	G	A	C	C	G	T	G	T	C	G	C	C	C	T	T	A	C	T	C	A	G	C	C	C	C	A	C	A	A	G	T	A	G	C	G
246	G	C	C	C	A	G	C	C	A	T	A	A	C	G	G	A	C	C	G	T	G	T	C	G	C	C	C	T	T	A	C	T	C	A	G	C	C	C	C	A	C	A	A	G	T	A	G	C	G
247	?	C	?	?	?	?	C	?	A	T	A	A	?	?	?	A	C	?	?	T	?	T	?	G	C	C	?	?	?	?	C	T	C	?	G	?	C	C	C	?	C	?	?	G	T	?	G	C	?
248	G	?	C	C	A	G	C	C	A	T	?	A	C	G	G	A	C	C	G	T	G	T	C	G	C	C	C	T	T	A	C	T	C	A	G	C	C	C	C	A	C	A	A	G	T	A	G	C	G
249	G	C	C	C	A	G	C	C	A	T	A	A	C	G	G	A	C	C	G	T	G	T	C	G	C	C	C	T	T	A	C	T	C	A	G	C	C	C	C	A	C	A	A	G	T	A	G	C	G
253	G	C	C	C	A	G	C	C	A	T	A	A	C	G	G	A	C	C	G	T	G	T	C	G	C	C	C	T	T	A	C	T	C	A	G	C	C	C	C	A	C	A	A	G	T	A	G	C	G
259	G	C	C	C	A	G	C	C	A	T	A	A	C	G	G	A	C	C	G	T	G	T	C	G	C	C	C	T	T	A	C	T	C	A	G	C	C	C	C	A	C	A	A	G	T	A	G	C	G
270	G	C	C	C	A	G	C	C	A	T	A	A	C	G	G	A	C	C	G	T	G	T	C	G	C	C	C	T	T	A	C	T	C	A	G	C	C	C	C	A	C	A	A	G	T	A	G	C	G
272	G	C	C	C	A	G	C	C	A	T	A	A	C	G	G	A	C	C	G	T	G	T	C	G	C	C	C	T	T	A	C	T	C	A	G	C	C	C	C	A	C	A	A	G	T	A	G	C	G
275	G	C	C	C	A	G	C	C	A	T	A	A	C	G	G	A	C	C	G	T	G	T	C	G	C	C	C	T	?	?	C	T	C	A	G	C	T	C	C	A	C	A	A	G	T	A	G	C	G
283	G	C	C	C	A	G	C	C	A	T	A	A	C	G	G	A	C	C	G	T	G	T	C	G	C	C	C	T	T	A	C	T	C	A	G	C	C	C	C	A	C	A	A	G	T	A	G	C	G
304	G	C	C	C	A	G	C	C	A	T	A	A	C	G	G	A	C	C	G	T	G	T	C	G	C	C	C	T	T	A	C	T	C	A	G	C	C	C	C	A	C	A	A	G	T	A	G	C	G
501	G	C	C	C	A	G	C	C	A	T	A	A	C	G	G	A	C	C	G	T	G	T	C	G	C	C	C	T	T	A	C	T	C	A	G	C	C	C	C	A	C	A	A	G	T	A	G	C	G
504	G	C	C	?	A	G	C	C	A	T	A	A	C	G	G	A	C	C	G	T	G	T	C	G	C	C	C	T	T	A	C	T	C	A	G	C	C	C	C	A	C	A	A	G	T	A	G	C	G
505	G	C	C	C	A	G	C	C	A	T	A	A	C	G	G	A	C	C	G	T	G	T	C	G	C	C	C	T	T	A	C	T	C	A	G	C	C	C	C	A	C	A	A	G	T	A	G	C	G
507	G	C	C	C	A	G	C	C	A	T	A	A	C	G	G	A	C	C	G	T	G	T	C	G	C	C	C	T	T	A	C	T	C	A	G	C	C	C	C	A	C	A	A	G	T	A	G	C	G
513	G	C	C	C	A	G	C	C	A	T	A	A	C	G	G	A	C	C	G	T	G	T	C	G	C	C	C	T	T	A	C	T	C	A	G	C	C	C	C	A	C	A	A	G	T	A	G	C	G
515	G	C	C	C	A	G	C	C	A	T	A	A	T	A	G	A	T	C	G	C	G	T	C	T	C	C	C	T	C	A	C	T	C	A	A	C	C	T	C	A	C	G	A	A	T	A	G	C	G
516	G	C	C	C	A	G	C	C	A	T	A	A	T	A	G	A	T	C	G	C	G	T	C	T	C	C	C	T	C	A	C	T	C	A	A	C	C	T	C	A	C	G	A	A	T	A	G	C	G
517	G	C	C	C	A	G	C	C	A	T	A	A	T	A	G	A	T	C	G	C	G	T	C	T	C	C	C	T	C	A	C	T	C	A	A	C	C	T	C	A	C	G	A	A	T	A	G	C	G
518	G	C	C	C	A	G	C	C	A	T	A	A	T	A	G	A	T	C	G	C	G	T	C	T	C	C	C	T	C	A	C	T	C	A	A	C	C	T	C	A	C	G	A	A	T	A	G	C	G
519	G	C	C	C	A	G	C	C	A	T	A	A	T	A	G	A	T	C	G	C	G	T	C	T	C	C	C	T	C	A	C	T	C	A	A	C	C	T	C	A	C	G	A	?	T	A	G	C	G
520	G	C	C	C	A	G	C	C	A	T	A	A	T	A	G	A	T	C	G	C	G	T	C	T	C	C	C	T	C	A	C	T	C	A	A	C	C	T	C	A	C	G	A	A	T	A	G	C	G
521	G	C	C	C	A	G	C	C	A	T	A	A	C	G	G	A	C	C	G	T	G	T	C	G	C	C	C	T	T	A	C	T	C	A	G	C	C	C	C	A	C	A	A	G	T	A	G	C	G
523	G	C	C	C	A	G	C	C	A	T	A	A	C	G	G	A	C	C	G	T	G	T	C	G	C	C	C	T	T	A	C	T	C	A	G	C	C	C	C	A	C	A	A	G	T	A	G	C	G
524	G	C	C	C	A	G	C	C	A	T	A	A	C	G	G	A	C	C	G	T	G	T	C	G	C	C	C	T	T	A	C	T	C	A	G	C	C	C	C	A	C	A	A	G	T	A	G	C	G
527	G	C	C	C	A	G	C	C	A	T	A	A	C	G	G	A	C	C	G	T	G	T	C	G	C	C	C	T	T	A	C	T	C	A	G	C	C	C	C	A	C	A	A	G	T	A	G	C	G
528	G	C	C	C	A	G	C	C	A	T	A	A	C	G	G	A	C	C	G	T	G	T	C	G	C	C	C	T	T	A	C	T	C	A	G	C	C	C	C	A	C	A	A	G	T	A	G	C	G
529	G	C	C	C	A	G	C	C	A	T	A	A	C	G	G	A	C	C	G	T	G	T	C	G	C	C	C	T	T	A	C	T	C	A	G	C	C	C	C	A	C	A	A	G	T	A	G	C	G
532	G	C	C	C	A	G	C	C	A	T	A	A	C	G	G	A	C	C	G	T	G	T	C	G	C	C	C	T	T	A	C	T	C	A	G	C	C	C	C	A	C	A	A	G	T	A	G	C	?
535	G	C	C	C	A	G	C	C	A	T	A	A	C	G	G	A	C	C	G	T	G	T	C	G	C	C	C	T	T	A	C	T	C	A	G	C	C	C	C	A	C	A	A	G	T	A	G	C	G
536	G	C	C	C	T	G	C	C	A	T	A	A	C	G	G	A	T	C	G	C	G	T	C	G	C	C	C	T	T	A	C	T	C	A	G	C	C	C	C	A	T	A	A	G	T	A	G	C	G
537	G	C	C	C	T	G	C	C	A	T	A	A	C	G	G	A	T	C	G	C	G	T	C	G	C	C	C	T	T	A	C	T	C	A	G	C	C	C	C	A	T	A	A	G	T	A	G	C	G
538	G	C	C	C	T	G	C	C	A	T	A	A	C	G	G	A	T	C	G	C	G	T	C	G	C	C	C	T	T	A	C	T	C	A	G	C	C	C	C	A	T	A	A	G	T	A	G	C	G
539	G	C	C	C	T	G	C	C	A	T	A	A	C	G	G	A	T	C	G	C	G	T	C	G	C	C	C	T	T	A	C	T	C	A	G	C	C	C	C	A	T	A	A	G	T	A	G	C	G
540	G	C	C	C	T	G	C	C	A	T	A	A	C	G	G	A	T	C	G	C	G	T	C	G	C	C	C	T	T	A	C	T	C	A	G	C	C	C	C	A	T	A	A	G	T	A	G	C	G
541	G	C	C	C	A	G	C	C	A	T	A	A	T	G	G	A	T	C	G	C	G	T	C	G	C	C	C	T	T	A	C	T	C	A	G	C	C	T	C	A	C	G	A	A	T	A	G	C	G
542	G	C	C	C	T	G	C	C	A	T	A	A	C	G	G	A	T	C	G	C	G	T	C	G	C	C	C	T	T	A	C	T	C	A	G	C	C	C	C	A	T	A	A	G	T	A	G	C	G
543	G	C	C	C	T	G	C	C	A	T	A	A	C	G	G	A	T	C	G	C	G	T	C	G	C	C	C	T	T	A	C	T	C	A	G	C	C	C	C	A	T	A	A	G	T	A	G	C	G
544	A	C	C	C	T	G	C	C	A	T	A	A	C	G	G	A	T	C	G	C	G	T	T	G	C	C	C	T	T	A	C	T	C	A	G	C	C	C	C	A	T	A	A	G	T	A	G	C	G
545	A	C	C	C	T	G	C	C	A	T	A	A	C	G	G	A	T	C	G	C	G	T	T	G	C	C	C	T	T	A	C	T	C	A	G	C	C	C	C	A	T	A	A	G	T	A	G	C	G
546	G	C	C	C	A	G	C	C	A	T	A	A	T	G	G	A	T	C	G	C	G	T	C	G	C	C	C	T	T	A	C	T	C	A	G	C	C	T	C	A	C	G	A	A	T	A	G	C	G
547	A	C	C	C	T	G	C	C	A	T	A	A	C	G	G	A	T	C	G	C	G	T	T	G	C	C	C	T	T	A	C	T	C	A	G	C	C	C	C	A	T	A	A	G	T	A	G	C	G
548	A	C	C	C	T	G	C	C	A	T	A	A	C	G	G	A	T	C	G	C	G	T	T	G	C	C	C	T	T	A	C	T	C	A	G	C	C	C	C	A	T	A	A	G	T	A	G	C	G
549	A	C	C	C	T	G	C	C	A	T	A	A	C	G	G	A	T	C	G	C	G	T	T	G	C	C	C	T	T	A	C	T	C	A	G	T	C	C	C	A	T	A	A	G	T	A	G	C	G
550	A	C	C	C	T	G	C	C	A	T	A	A	C	G	G	A	T	C	G	C	G	T	T	G	C	C	C	T	T	A	C	T	C	A	G	C	C	C	C	A	T	A	A	G	T	A	G	C	G
551	A	C	C	C	T	G	C	C	A	T	A	A	C	G	G	A	T	C	G	C	G	T	T	G	C	C	C	T	T	A	C	T	C	A	G	C	C	C	C	A	T	A	A	G	T	A	G	C	G
552	A	C	C	C	T	G	C	C	A	T	A	A	C	G	G	A	T	C	G	C	G	T	T	G	C	C	C	T	T	A	C	T	C	A	G	C	C	C	C	A	T	A	A	G	T	A	G	C	G
553	A	C	C	C	T	G	C	C	A	T	A	A	C	G	G	A	T	C	G	C	G	T	T	G	C	C	C	T	T	A	C	T	C	A	G	C	C	C	C	A	T	A	A	G	T	A	G	C	G
554	A	C	C	C	T	G	C	C	A	T	A	A	C	G	G	A	T	C	G	C	G	T	T	G	C	C	C	T	T	A	C	T	C	A	G	C	C	C	C	A	T	A	A	G	T	A	G	C	G
556	G	C	C	C	A	G	C	C	A	T	A	A	T	A	G	A	T	C	G	C	G	T	C	T	C	C	C	T	C	A	C	T	C	A	A	C	C	T	C	A	C	G	A	A	T	A	G	C	G
557	G	C	C	C	A	G	C	C	A	T	A	A	T	A	G	A	T	C	G	C	G	T	C	T	C	C	C	T	C	A	C	T	C	A	A	C	C	T	C	A	C	G	A	A	T	A	G	C	G
558	G	C	C	C	A	G	C	C	A	T	A	A	T	A	G	A	T	C	G	C	G	T	C	T	C	C	C	T	C	A	C	T	C	A	A	C	C	T	C	A	C	G	A	A	T	A	G	C	G
559	G	C	C	C	A	G	C	C	A	T	A	A	T	A	G	A	T	C	G	C	G	T	C	T	C	C	C	T	C	A	C	T	C	A	A	C	C	T	C	A	C	G	A	A	T	A	G	C	G
560	G	C	C	C	A	G	C	C	A	T	A	A	T	A	G	A	T	C	G	C	G	T	C	T	C	C	C	T	C	A	C	T	C	A	A	C	C	T	C	A	C	G	A	A	T	A	G	C	G
561	G	C	C	C	A	G	C	C	A	T	A	A	T	A	G	A	T	C	G	C	G	T	C	T	C	C	C	T	C	A	C	T	C	A	A	C	C	T	C	A	C	G	A	A	T	A	G	C	G
562	G	C	C	C	A	G	C	C	A	T	A	A	T	A	G	A	T	C	G	C	G	T	C	T	C	C	C	T	C	A	C	T	C	A	A	C	C	T	C	A	C	G	A	A	T	A	G	C	G
563	G	C	C	C	A	G	C	C	A	T	A	A	T	A	G	A	T	C	G	C	G	T	C	T	C	C	C	T	C	A	C	T	C	A	A	C	C	T	C	A	C	G	A	A	T	A	G	C	G
565	G	C	C	C	A	G	C	C	A	T	A	A	T	A	G	A	T	C	G	C	G	T	C	T	C	C	C	T	C	A	C	T	C	A	A	C	C	T	C	A	C	G	A	A	T	A	G	C	G
566	G	C	C	C	T	G	C	C	A	T	A	A	C	G	G	A	T	C	G	C	G	T	C	G	C	C	C	T	T	A	C	T	C	A	G	C	C	C	C	A	T	A	A	G	T	A	G	C	G
568	G	C	C	C	A	G	C	C	A	T	A	A	C	G	G	A	C	C	G	T	G	T	C	G	C	C	C	T	T	A	C	T	C	A	G	C	C	C	C	A	C	A	A	G	T	A	G	C	G
571	G	C	C	C	A	G	C	C	A	T	A	A	C	G	G	A	C	C	G	T	G	T	C	G	C	C	C	T	T	A	C	T	C	A	G	C	C	C	C	A	C	A	A	G	T	A	G	C	G
573	G	C	C	C	A	G	C	C	G	T	A	A	C	G	G	A	C	C	G	T	G	T	C	G	C	C	C	T	T	A	C	T	C	A	G	C	C	C	C	A	C	A	A	G	T	A	G	C	G
574	G	C	C	C	A	G	C	C	G	T	A	A	C	G	G	A	C	C	G	T	G	T	C	G	C	C	C	T	T	A	C	T	C	A	G	C	C	C	C	A	C	A	A	G	T	G	G	C	G
577	G	C	C	C	A	G	C	C	A	T	A	A	C	G	G	A	C	C	G	T	G	T	C	G	C	C	C	T	T	A	C	T	C	A	G	C	C	C	C	A	C	A	A	G	T	A	G	C	G
578	G	C	C	C	A	G	C	C	A	T	A	A	C	?	G	A	C	C	G	T	G	T	C	G	C	C	C	T	T	A	C	T	C	A	G	C	C	C	C	A	C	A	A	G	T	A	G	C	G
579	?	C	C	?	A	G	C	C	A	T	A	A	C	?	?	A	C	C	G	T	G	T	C	G	C	C	C	?	?	?	C	T	C	?	G	C	C	C	C	A	C	A	?	G	T	?	G	C	?
585	G	C	C	C	A	G	C	C	A	T	A	A	C	G	G	A	C	C	G	T	G	T	C	G	?	C	C	T	T	A	C	T	C	A	G	C	C	C	C	A	C	A	A	G	T	A	G	C	G
594	G	?	C	C	A	G	C	C	A	T	?	A	C	G	G	A	C	C	G	T	G	T	C	G	C	C	C	T	T	A	C	T	C	A	G	C	C	C	C	A	C	A	A	G	T	A	G	C	G
600	G	C	C	C	A	G	C	C	A	T	A	A	C	G	G	A	C	C	G	T	G	T	C	G	C	C	C	T	T	A	C	T	C	A	G	C	C	C	C	A	C	A	A	G	T	A	G	C	G
601	G	C	C	C	A	G	C	C	A	T	A	A	C	G	G	A	C	C	G	T	G	T	C	G	C	C	C	T	T	A	C	T	C	A	G	C	C	C	C	A	C	A	A	G	T	A	G	C	G
604	G	C	C	C	A	G	C	C	A	T	A	A	C	G	G	A	C	C	G	T	G	T	C	G	C	C	C	T	T	A	C	T	C	A	G	C	C	C	C	A	C	A	A	G	T	A	G	C	G
606	G	C	C	C	A	G	C	C	A	T	A	A	C	G	G	A	C	C	G	T	G	T	C	G	C	C	C	T	T	A	C	T	C	A	G	C	C	C	C	A	?	A	A	G	T	A	G	C	G
608	G	C	C	C	A	G	C	C	A	T	A	A	C	G	G	A	C	C	G	T	G	T	C	G	C	C	C	T	T	A	C	T	C	A	G	C	C	C	C	A	C	A	A	G	T	A	G	C	G
610	G	C	C	C	A	G	C	C	A	T	A	A	C	G	G	A	C	C	G	T	G	T	C	G	C	C	C	T	T	A	C	T	C	A	G	C	C	C	C	A	C	A	A	G	T	A	G	C	G
611	G	C	C	C	A	G	C	C	A	T	A	A	T	G	G	A	T	C	G	C	G	T	C	G	C	C	C	T	T	A	C	T	C	A	G	C	C	T	C	A	C	G	A	A	T	A	G	C	G
612	G	C	C	C	A	G	C	C	A	T	A	A	C	G	G	A	C	C	G	T	G	T	C	G	C	C	C	T	T	A	C	T	C	A	G	C	C	C	C	A	C	A	A	G	T	A	G	C	G
613	G	C	C	C	A	G	C	C	A	T	A	A	C	G	G	A	C	C	G	T	G	T	C	G	C	C	C	T	T	A	C	T	C	A	G	C	C	C	C	A	C	A	A	G	T	A	G	C	G
616	G	C	C	C	A	G	C	C	A	T	A	A	T	A	G	A	T	C	G	C	G	T	C	T	C	C	C	T	C	A	C	T	C	A	A	C	C	T	C	A	C	G	A	A	T	A	G	C	G
617	G	C	C	C	A	G	C	C	A	T	A	A	T	A	G	A	T	C	G	C	G	T	C	T	C	C	C	T	C	A	C	T	C	A	A	C	C	T	C	A	C	G	A	A	T	A	G	C	G
619	G	C	C	C	A	G	C	C	A	T	A	A	C	G	G	A	C	C	G	T	G	T	C	G	C	C	C	T	T	A	C	T	C	A	G	C	C	C	C	A	C	A	A	G	T	A	G	C	G
637	G	C	C	C	A	G	C	C	A	T	A	A	C	G	G	A	C	C	G	T	G	T	C	G	C	C	C	T	T	A	C	T	C	A	G	C	C	C	C	A	C	A	A	G	T	A	G	C	G
643	G	C	C	C	A	G	C	C	A	T	A	A	C	G	G	A	C	C	G	T	G	T	C	G	C	C	C	T	T	A	C	T	C	A	G	C	C	C	C	A	C	A	A	G	T	A	G	C	G
656	G	C	C	C	A	G	C	C	A	T	A	A	C	G	G	A	C	C	G	T	G	T	C	G	C	C	C	T	T	A	C	T	C	A	G	C	C	C	C	A	C	A	A	G	T	A	G	C	G
657	G	C	C	C	A	G	C	C	A	T	A	A	C	G	G	A	C	C	G	T	G	T	C	G	C	C	C	T	T	A	C	T	C	A	G	C	C	C	C	A	C	A	A	G	T	A	G	C	G
658	G	C	C	C	A	G	C	C	A	T	A	A	C	G	G	A	C	C	G	T	G	T	C	G	C	C	C	T	T	A	C	T	C	A	G	C	C	C	C	A	C	A	A	G	T	A	G	C	G
659	G	C	C	C	A	G	C	C	A	T	A	A	C	G	G	A	C	C	G	T	G	T	C	G	C	C	C	T	T	A	C	T	C	A	G	C	C	C	C	A	C	A	A	G	T	A	G	C	G
661	G	C	C	C	A	G	C	C	A	T	A	A	C	G	G	A	C	C	G	T	G	T	C	G	C	C	C	T	T	A	C	T	C	A	G	C	C	C	C	A	C	A	A	G	T	A	G	C	G
662	G	C	C	C	A	G	C	C	A	T	A	A	C	G	G	A	C	C	G	T	G	T	C	G	C	C	C	T	T	A	C	T	C	A	G	C	C	C	C	A	C	A	A	G	T	A	G	C	G
664	G	C	C	C	A	G	C	C	A	T	A	A	C	G	G	A	C	C	G	T	G	T	C	G	C	C	C	T	T	A	C	T	C	A	G	C	C	C	C	A	C	A	A	G	T	A	G	C	G
665	G	C	C	C	A	G	C	C	A	T	A	A	C	G	G	A	C	C	G	T	G	T	C	G	C	C	C	T	T	A	C	T	C	A	G	C	C	C	C	A	C	A	A	G	T	A	G	C	G
666	G	C	C	C	A	G	C	C	A	T	A	A	C	G	G	A	C	C	G	T	G	T	C	G	C	C	C	T	T	A	C	T	C	A	G	C	C	C	C	A	C	A	A	G	T	A	G	C	G
667	G	C	C	C	A	G	C	C	A	T	A	A	C	G	G	A	C	C	G	T	G	T	C	G	C	C	C	T	T	A	C	T	C	A	G	C	C	C	C	A	C	A	A	G	T	A	G	C	G
668	G	C	C	C	A	G	C	C	A	T	A	A	C	G	G	A	C	C	G	T	G	T	C	G	C	C	C	T	T	A	C	T	C	A	G	C	C	C	C	A	C	A	A	G	T	A	G	C	G
669	G	C	C	C	A	G	C	C	A	T	A	A	T	A	G	A	T	C	G	C	G	T	C	T	C	C	C	T	C	A	C	T	C	A	A	C	C	T	C	A	C	G	A	A	T	A	G	C	G
670	G	C	C	C	A	G	C	C	A	T	A	A	T	A	G	A	T	C	G	C	G	T	C	T	C	C	C	T	C	A	C	T	C	A	A	C	C	T	C	A	C	G	A	A	T	A	G	C	G
674	G	C	C	C	A	G	C	C	A	T	A	A	C	G	G	A	C	C	G	T	G	T	C	G	C	C	C	T	T	A	C	T	C	A	G	C	C	C	C	A	C	A	A	G	T	A	G	C	G
677	A	C	C	C	T	G	C	C	A	T	A	A	C	G	G	A	T	C	G	C	G	T	T	G	C	C	C	T	T	A	C	T	C	A	G	C	C	C	C	A	T	A	A	G	T	A	G	C	G
678	G	C	C	C	A	G	C	C	A	T	A	A	C	G	G	A	C	C	G	T	G	T	C	G	C	C	C	T	T	A	C	T	C	A	G	C	C	C	C	A	C	A	A	G	T	A	G	C	G
685	G	C	C	C	A	G	C	C	A	T	A	A	C	G	G	A	C	C	G	T	G	T	C	G	C	C	C	T	T	A	C	T	C	A	G	C	C	C	C	A	C	A	A	G	T	A	G	C	G
695	?	C	C	?	?	?	C	?	A	T	A	A	C	?	?	A	C	C	?	T	G	T	C	G	C	C	?	?	?	?	?	T	C	?	G	?	C	C	C	A	C	?	?	?	?	?	G	C	?
696	G	C	C	C	A	G	C	C	A	T	A	A	C	G	G	A	C	C	G	T	G	T	C	G	C	C	C	T	T	A	C	T	C	A	G	C	C	C	C	A	C	A	A	G	T	A	G	C	G
772	G	C	C	C	A	G	C	C	A	T	A	A	C	G	G	A	C	C	G	T	G	T	C	G	C	C	C	T	T	A	C	T	C	A	G	C	C	C	C	A	C	A	A	G	T	A	G	C	G
820	G	C	C	C	A	G	C	C	A	T	A	A	C	G	G	A	C	C	G	T	G	T	C	G	C	C	C	T	T	A	C	T	C	A	G	C	C	C	C	A	C	A	A	G	T	A	G	C	G
847	G	C	C	C	A	G	C	C	A	T	A	A	C	G	G	A	C	C	G	T	G	T	C	G	C	C	C	T	T	A	C	T	C	A	G	C	C	C	C	A	C	A	A	G	T	A	G	C	G
91001	?	C	T	?	?	?	C	?	A	T	A	A	C	?	?	G	T	C	G	C	G	T	C	G	T	C	?	T	T	T	C	G	C	?	?	?	?	?	C	C	C	G	?	G	T	?	G	A	?
989	G	C	C	C	A	G	C	C	A	T	A	A	C	G	G	A	C	C	G	T	G	T	C	G	C	C	C	T	T	A	C	T	C	A	G	C	C	C	C	A	C	A	A	G	T	A	G	C	G
A1956001	G	C	C	C	A	G	C	C	A	T	A	A	C	G	G	A	T	C	G	C	G	T	C	G	C	C	C	T	T	A	C	T	C	A	G	C	C	C	C	A	C	G	A	G	T	A	G	C	G
A1966002	G	C	C	A	A	G	C	C	A	T	A	A	C	G	G	A	T	C	G	C	G	T	C	G	C	C	C	T	T	A	C	G	C	A	G	C	C	C	C	A	C	G	A	G	T	G	G	C	G
A1966003	G	C	C	C	A	G	C	C	A	T	A	A	T	G	G	A	T	C	G	C	G	T	C	T	C	C	C	T	C	A	C	T	C	A	G	C	C	T	C	A	C	G	A	A	T	A	G	C	G
A1989002	G	C	C	C	A	G	C	C	A	T	A	A	C	G	G	A	T	C	G	C	G	T	C	G	C	C	C	T	T	A	C	T	C	A	G	C	C	C	C	A	C	G	A	G	T	A	G	C	G
A1992002	G	C	C	C	A	G	C	C	A	T	A	A	C	G	G	A	T	C	G	C	G	T	C	G	C	C	C	T	T	A	C	T	C	A	G	C	C	C	C	A	C	G	A	G	T	A	G	C	G
B1959001	G	C	C	A	A	G	C	C	A	T	A	A	C	G	G	A	T	C	G	C	G	T	C	G	C	C	C	T	T	A	C	G	C	A	G	C	C	C	C	A	C	G	A	G	T	G	G	C	G
B1965003	G	C	C	C	A	G	C	C	A	T	A	A	T	G	G	A	T	C	G	C	G	T	C	G	C	C	C	T	T	A	C	T	C	A	G	C	C	T	C	A	C	G	A	A	T	A	G	C	G
B1965004	G	C	C	A	A	G	C	C	A	T	A	A	C	G	?	A	T	C	G	C	G	T	C	G	C	C	C	T	T	A	C	G	C	?	G	C	C	C	C	A	C	G	?	G	T	?	G	C	?
B1971001	G	C	C	A	A	G	C	C	A	T	A	A	C	G	G	A	T	C	G	C	G	T	C	G	C	C	C	T	T	A	C	G	C	A	G	C	C	C	C	A	C	G	A	G	T	G	G	C	G
B1972002	G	C	C	A	A	G	C	C	A	T	A	A	C	G	G	A	T	C	G	C	G	T	C	G	C	C	C	T	T	A	C	G	C	A	G	C	C	C	C	A	C	G	A	G	T	G	G	C	G
B1976002	G	C	C	A	A	G	C	C	A	T	A	A	C	G	G	A	T	C	G	C	G	T	C	G	C	C	C	T	T	A	C	G	C	A	G	C	C	C	C	A	C	G	A	G	T	G	G	C	G
B1976004	G	?	C	A	A	G	C	C	A	T	?	A	C	G	G	A	T	C	G	C	G	T	C	G	C	C	C	T	T	A	C	G	C	A	G	C	C	C	C	A	C	G	A	G	T	G	G	C	G
B1981002	G	C	C	?	?	?	C	?	A	T	A	A	C	?	G	A	T	C	G	C	G	T	C	G	C	C	C	T	T	A	C	G	C	A	G	C	C	C	C	A	C	G	A	G	T	G	G	C	G
B1983005	G	C	C	A	A	G	C	C	A	T	A	A	C	G	G	A	T	C	G	C	G	T	C	G	C	C	C	T	?	?	C	G	C	A	G	C	C	C	C	A	C	G	A	G	T	G	G	C	G
B1984002	G	C	C	A	A	G	C	C	A	T	A	A	C	G	G	A	T	C	G	C	G	T	C	G	C	C	C	T	T	A	C	G	C	A	G	C	C	C	C	A	C	G	A	G	T	G	G	C	G
C1954002	G	C	C	C	A	G	C	C	A	T	A	A	C	G	G	A	C	C	G	T	G	T	C	G	C	C	C	T	T	A	C	T	C	A	G	C	C	C	C	A	C	A	A	G	T	A	G	C	G
C1960003	G	C	C	C	A	G	C	C	A	T	A	A	C	G	G	A	C	C	G	T	G	T	C	G	C	C	C	T	T	A	C	T	C	A	G	C	C	C	C	A	C	A	A	G	T	A	G	C	G
C1960004	G	C	C	C	A	G	C	C	A	T	A	A	C	G	G	A	C	C	G	T	G	T	C	G	C	C	C	T	T	A	C	T	C	A	G	C	C	C	C	A	C	A	A	G	T	A	G	C	G
C1962001	G	C	C	C	A	G	C	C	A	T	A	A	C	G	G	A	C	C	G	T	G	T	C	G	C	C	C	T	T	A	C	T	C	A	G	C	C	C	C	A	C	A	A	G	T	A	G	C	G
C1962002	G	C	T	A	A	G	C	C	A	C	A	A	C	A	G	G	T	C	G	T	G	T	C	G	C	C	T	T	T	T	C	G	C	A	G	C	C	C	C	A	C	G	A	G	C	G	G	C	G
C1970022	G	C	C	C	A	G	C	C	A	T	A	A	C	G	G	A	C	C	G	T	G	T	C	G	C	C	C	T	T	A	C	T	C	A	G	C	C	C	C	A	C	A	A	G	T	A	G	C	G
C1972003	G	C	C	C	A	G	C	C	A	T	A	A	C	G	G	A	C	C	G	T	G	T	C	G	C	C	C	T	T	A	C	T	C	A	G	C	C	C	C	A	C	A	A	G	T	A	G	C	G
C1972004	G	C	C	C	A	G	C	C	A	T	A	A	C	G	G	A	T	C	G	C	G	T	C	G	C	C	C	T	T	A	C	T	C	A	G	C	C	C	C	A	C	G	A	G	T	A	G	C	G
C1975001	G	C	C	C	A	G	C	C	A	T	A	A	C	G	G	A	C	C	G	T	G	T	C	G	C	C	C	T	T	A	C	T	C	A	G	C	C	C	C	A	C	A	A	G	T	A	G	C	G
C1976001	G	C	C	C	A	G	C	C	A	T	A	A	C	G	G	A	C	C	G	T	G	T	C	G	C	C	C	T	T	A	C	T	C	A	G	C	C	C	C	A	C	A	A	G	T	A	G	C	G
C1976002	G	C	C	C	A	G	C	C	A	T	A	A	C	G	G	A	C	C	G	T	G	T	C	G	C	C	C	T	T	A	C	T	C	A	G	C	C	C	C	A	C	A	A	G	T	A	G	C	G
C1976003	G	C	C	C	A	G	C	C	A	T	A	A	C	G	G	A	T	C	G	C	G	T	C	G	C	C	C	T	T	A	C	T	C	A	G	C	C	C	C	A	C	G	A	G	T	A	G	C	G
C1977001	G	C	C	C	A	G	C	C	A	T	A	A	C	G	G	A	C	C	G	T	G	T	C	G	?	C	C	T	T	A	C	T	C	A	G	C	C	C	C	A	C	A	A	G	T	A	G	C	G
C1979001	G	C	C	C	A	G	C	C	A	T	A	A	C	G	G	A	C	C	G	T	G	T	C	G	C	C	C	T	T	A	C	T	C	A	G	C	C	C	C	A	C	A	A	G	T	A	G	C	G
C1980003	G	C	C	C	A	G	C	C	A	T	A	A	C	G	G	A	C	C	G	T	G	T	C	G	C	C	C	T	T	A	C	T	C	A	G	C	C	C	C	A	C	A	A	G	T	A	G	C	G
C1984011	G	C	C	C	A	G	C	C	A	T	A	A	C	G	G	A	C	C	G	T	G	T	C	G	C	C	C	T	T	A	C	T	C	A	G	C	C	C	C	A	C	A	A	G	T	A	G	C	G
C1985002	G	?	C	C	A	G	C	C	A	T	?	A	C	G	G	A	C	C	G	T	G	T	C	G	C	C	C	T	T	A	C	T	C	A	G	C	C	C	C	A	C	A	A	G	T	A	G	C	G
C1985003	G	C	C	C	A	G	C	C	A	T	A	A	C	G	G	A	C	C	G	T	G	T	C	G	C	C	C	T	T	A	C	T	C	A	G	C	C	C	C	A	C	A	A	G	T	A	G	C	G
C1985005	G	C	C	C	A	G	C	C	?	T	A	?	C	G	G	?	C	C	G	T	G	T	C	G	C	?	C	T	T	A	C	T	C	A	G	C	C	C	C	A	C	A	A	G	T	A	G	C	G
C1987002	G	C	C	A	A	G	C	C	A	T	A	A	C	G	G	A	T	C	G	C	G	T	C	G	C	C	C	T	T	A	C	G	C	A	G	C	C	C	C	A	C	G	A	G	T	G	G	C	G
C1989001	G	C	C	C	A	G	C	C	A	T	A	A	C	G	G	A	C	C	G	T	G	T	C	G	C	C	C	T	T	A	C	T	C	A	G	C	C	C	C	A	C	A	A	G	T	A	G	C	G
C1994002	G	C	C	C	A	G	C	C	A	T	A	A	C	G	G	A	C	C	G	T	G	T	C	G	C	C	C	T	T	A	C	T	C	A	G	C	C	C	C	A	C	A	A	G	T	A	G	C	G
C2000001	G	C	C	C	A	G	C	C	A	T	A	A	C	G	G	A	C	C	G	T	G	T	C	G	C	C	C	T	T	A	C	T	C	A	G	C	C	C	C	A	C	A	A	G	T	A	G	C	G
CO92	G	C	C	C	A	G	C	C	G	T	A	A	C	G	?	A	C	C	G	T	G	T	C	G	C	C	C	T	T	A	C	T	C	A	G	C	C	C	C	A	C	A	A	G	T	A	G	C	G
D1964003	G	C	C	C	A	G	C	C	A	T	A	A	C	G	G	A	C	C	G	T	G	T	C	G	C	C	C	T	T	A	C	T	C	A	G	C	C	C	C	A	C	A	A	G	T	A	G	C	G
D1964013	G	C	C	C	A	G	C	C	A	T	A	A	C	G	G	A	C	C	G	T	G	T	C	G	C	C	C	T	T	A	C	T	C	A	G	C	C	C	C	A	C	A	A	G	T	A	G	C	G
D1977001	G	C	C	C	A	G	C	C	A	T	A	A	C	G	G	A	C	C	G	T	G	T	C	G	C	C	C	T	T	A	C	T	C	A	G	C	C	C	C	A	C	A	A	G	T	A	G	C	G
D1982002	G	C	C	C	A	G	C	C	A	T	A	A	C	G	G	A	C	C	G	T	G	T	C	G	C	C	C	T	T	A	C	T	C	A	G	C	C	C	C	A	C	A	A	G	T	A	G	C	G
D1991002	G	C	C	C	A	G	C	C	A	T	A	A	C	G	G	A	C	C	G	T	G	T	C	G	?	C	C	T	T	A	C	T	C	A	G	C	C	C	C	A	C	A	A	G	T	A	G	?	G
D1991003	G	?	C	C	A	G	C	C	A	T	?	A	C	G	G	A	C	C	G	T	G	T	C	G	C	C	C	T	T	A	C	T	C	A	G	C	C	C	C	A	C	A	A	G	T	A	G	C	G
E1954005	G	C	C	C	A	G	C	C	A	T	A	A	C	G	G	A	C	C	G	T	A	T	C	G	C	C	C	T	T	A	C	T	C	A	G	C	C	C	C	A	C	A	A	G	T	A	G	C	G
E1977002	G	C	C	C	A	G	C	C	A	T	A	A	C	G	G	A	C	C	G	T	A	T	C	G	C	C	C	T	T	A	C	T	C	A	G	C	C	C	C	A	C	A	A	G	T	A	G	C	G
E1977003	G	C	C	C	A	G	C	C	A	T	A	A	C	G	G	A	C	C	G	T	A	T	C	G	C	C	C	T	T	A	C	T	C	A	G	C	C	C	C	A	C	A	A	G	T	A	G	C	G
F1946001	G	C	C	C	A	G	C	C	A	T	A	A	C	G	G	A	C	C	G	T	G	T	C	G	C	C	C	T	T	A	C	T	C	A	G	C	C	C	C	A	C	A	A	G	T	A	G	C	G
F1952001	G	C	C	C	A	G	C	C	A	T	A	A	C	G	?	A	C	C	G	T	G	T	C	G	C	C	C	T	T	A	C	T	C	A	G	C	C	C	C	A	C	A	A	G	T	A	G	C	?
F1953005	G	C	C	C	A	G	C	C	A	T	A	A	C	G	G	A	C	C	G	T	G	T	C	G	C	C	C	T	T	A	C	T	C	A	G	C	C	C	C	A	C	A	A	G	T	A	G	C	G
F1954001	G	C	C	C	A	G	C	C	A	T	A	A	C	G	G	A	C	C	G	T	G	T	C	G	C	C	C	T	T	A	C	T	C	A	G	C	C	C	C	A	C	A	A	G	T	A	G	C	G
F1955003	G	C	C	C	A	G	C	C	A	T	A	A	C	G	G	A	C	C	G	T	G	T	C	G	C	C	C	T	T	A	C	T	C	A	G	C	C	C	C	A	C	A	A	G	T	A	G	C	G
F1984002	G	C	C	C	A	G	C	C	A	T	A	A	C	G	G	A	C	C	G	T	A	T	C	G	C	C	C	T	T	A	C	T	C	?	G	C	C	C	C	A	C	A	A	G	T	A	G	C	G
F1984004	G	?	C	C	A	G	C	C	A	T	?	A	C	G	G	A	C	C	G	T	G	T	C	G	C	C	C	T	T	A	C	T	C	A	G	C	C	C	C	A	C	A	A	G	T	A	G	C	G
F2000004	G	C	C	C	A	G	C	C	A	T	A	A	C	G	G	A	C	C	G	T	G	T	C	G	C	C	C	T	T	A	C	T	C	?	G	C	C	C	C	A	C	A	A	G	T	A	G	C	G
F2000005	G	C	C	C	A	G	C	C	A	T	A	A	C	G	G	A	C	C	G	T	G	T	C	G	C	C	C	T	T	A	C	T	C	A	G	C	C	C	C	A	C	A	A	G	T	A	G	C	G
G1966001	G	C	C	C	A	G	C	C	A	T	A	A	T	G	G	A	T	C	G	C	G	T	C	G	C	C	C	T	T	A	C	T	C	A	G	C	C	T	C	A	C	G	A	A	T	A	G	C	G
G1995005	G	C	C	C	A	G	C	C	A	T	A	A	T	G	G	A	T	C	G	C	G	T	C	G	C	C	C	T	T	A	C	T	C	A	G	C	C	T	C	A	C	?	A	A	T	A	G	C	G
G1996002	G	C	C	C	A	G	C	C	A	T	A	A	T	G	G	A	T	C	G	C	G	T	C	G	C	C	C	T	T	A	C	T	C	A	G	C	C	T	C	A	C	G	A	A	T	A	G	C	G
G1996005	G	?	C	C	A	G	C	C	A	T	?	A	T	G	G	A	T	C	G	C	G	T	C	G	C	C	C	T	T	A	C	T	C	A	G	C	C	T	C	A	C	G	A	A	T	A	G	C	G
G1996007	G	C	C	C	A	G	C	C	A	T	A	A	T	G	G	A	T	C	G	C	G	T	C	G	C	C	C	T	T	A	C	T	C	A	G	C	C	T	C	A	C	G	A	A	T	A	G	C	G
G1998001	G	C	C	C	A	G	C	C	?	T	A	?	T	G	G	?	T	C	G	C	G	T	C	G	C	?	C	T	T	A	C	T	C	A	G	C	C	T	C	A	C	G	A	A	T	A	G	C	G
H1948001	G	C	C	C	A	G	C	C	A	T	A	A	T	G	G	A	T	C	G	C	G	T	C	G	C	C	C	T	T	A	C	T	C	A	G	C	C	T	C	A	C	G	A	A	T	A	G	C	G
H1954006	G	C	C	C	A	G	C	C	A	T	A	A	T	G	G	A	T	C	G	C	G	T	C	G	C	C	C	T	T	A	C	T	C	A	G	C	C	T	C	A	C	?	A	A	T	A	G	C	G
H1958003	G	C	C	C	A	G	C	C	A	T	A	A	T	G	G	A	T	C	G	?	G	T	C	T	C	C	C	T	T	A	C	T	C	A	G	C	C	T	C	A	C	G	A	?	T	A	G	C	G
H1959003	G	C	C	C	A	G	C	C	A	T	A	A	T	G	G	A	T	C	G	C	G	T	C	G	C	C	C	T	T	A	C	T	C	A	G	C	C	T	C	A	C	G	A	A	T	A	G	C	G
H1960004	G	C	?	?	A	G	C	C	A	C	A	A	C	A	G	G	T	C	G	C	G	T	C	G	C	C	T	T	T	T	C	G	C	A	G	C	C	C	C	A	C	G	A	G	C	G	G	C	G
I1954003	G	C	C	C	A	G	C	C	A	T	A	A	C	G	G	A	C	C	G	T	G	T	C	G	C	C	C	T	T	A	C	T	C	A	G	C	C	C	C	A	C	A	A	G	T	A	G	C	G
I1957005	G	C	C	C	A	G	C	C	A	T	A	A	T	G	G	A	T	C	G	C	G	T	C	T	C	C	C	T	T	A	C	T	C	A	G	C	C	T	C	A	C	G	A	A	T	A	G	C	G
I1969003	G	C	C	C	A	G	C	C	A	T	A	A	T	G	G	A	T	C	G	C	G	T	C	T	C	C	C	T	T	A	C	T	C	A	G	C	C	T	C	A	C	G	A	A	T	A	G	C	G
I1970017	G	C	C	C	A	G	C	C	A	T	A	A	T	G	G	A	T	C	G	C	G	T	C	T	C	C	C	T	T	A	C	T	C	A	G	C	C	T	C	A	C	G	A	A	T	A	G	C	G
I1970020	G	C	C	C	A	G	C	C	A	T	A	A	T	G	G	A	T	C	G	C	G	T	C	G	C	C	C	T	T	A	C	T	C	A	G	C	C	T	C	A	C	G	A	A	T	A	G	C	G
I1970021	G	C	C	C	A	G	C	C	A	T	A	A	T	G	G	A	T	C	G	C	G	T	C	T	C	C	C	T	T	A	C	T	C	A	G	C	C	T	C	A	C	G	A	A	T	A	G	C	G
I1970025	G	?	C	C	A	G	C	C	?	T	?	A	?	G	G	A	T	C	G	C	?	T	?	?	?	C	C	T	T	A	C	?	C	A	G	C	C	T	C	A	C	?	A	?	T	A	G	?	?
I1972003	G	C	C	C	A	G	C	C	A	T	A	A	T	G	G	A	T	C	G	C	G	T	C	T	C	C	C	T	T	A	C	T	C	A	G	C	C	T	C	A	C	G	A	A	T	A	G	C	G
I1975003	G	C	C	C	A	G	C	C	A	T	A	A	T	G	G	A	T	C	G	C	G	T	C	T	C	C	C	T	T	A	C	T	C	A	G	C	C	T	C	A	C	G	A	A	T	A	G	C	G
I1986005	G	C	C	C	A	G	C	C	A	T	A	A	T	G	G	A	T	C	G	C	G	T	C	T	C	C	C	T	T	A	C	T	C	A	G	C	C	T	C	A	C	G	A	A	T	A	G	C	G
I1987001	G	C	C	C	A	G	C	C	A	T	A	A	T	G	G	A	T	C	G	C	G	T	C	T	C	C	C	T	T	A	C	T	C	A	G	C	C	T	C	A	C	G	A	A	T	A	G	C	G
I1991003	G	C	C	C	A	G	C	C	A	T	A	A	T	G	G	A	T	C	G	C	G	T	C	T	C	C	C	T	T	A	C	T	C	A	G	C	C	T	C	A	C	G	A	A	T	A	G	C	G
I1992005	G	C	C	C	A	G	C	C	A	T	A	A	T	G	G	A	T	C	G	C	G	T	C	T	C	C	C	T	T	A	C	T	C	A	G	C	C	T	C	A	C	G	A	A	T	A	G	C	G
I1997002	G	C	C	C	A	G	C	C	A	T	A	A	T	G	G	A	T	C	G	C	G	T	C	T	C	C	C	T	T	A	C	T	C	A	G	C	C	T	C	A	C	G	A	A	T	A	G	C	G
I1997003	G	C	C	C	A	G	C	C	A	T	A	A	T	G	G	A	T	C	G	C	G	T	C	T	C	C	C	T	T	A	C	T	C	A	G	C	C	T	C	A	C	G	A	A	T	A	G	C	G
I1998003	G	C	C	C	A	G	C	C	A	T	A	A	T	G	G	A	T	C	G	C	G	T	C	T	C	C	C	T	T	A	C	T	C	A	G	C	C	T	C	A	C	G	A	A	T	A	G	C	G
I2001013	G	?	C	C	A	G	C	C	A	T	?	A	T	G	G	A	T	C	G	C	G	T	C	T	C	C	C	T	T	A	C	T	C	A	G	C	C	T	C	A	C	G	A	A	T	A	G	C	G
J1962002	G	C	C	C	A	G	C	C	A	T	A	A	T	G	G	A	T	C	G	C	G	T	C	T	C	C	C	T	T	A	C	T	C	A	G	C	C	T	C	A	C	G	A	A	T	A	G	C	G
J1963004	G	C	C	C	A	G	C	C	A	T	A	A	T	G	G	A	T	C	G	C	G	T	C	T	C	C	C	T	T	A	C	T	C	A	G	C	C	T	C	A	C	G	A	A	T	A	G	C	G
J1971004	G	C	C	C	A	G	C	C	A	T	A	A	T	G	G	A	T	C	G	C	G	T	C	T	C	C	C	T	T	A	C	T	C	A	G	C	C	T	C	A	C	G	A	A	T	A	G	C	G
J1977003	G	C	C	C	A	G	C	C	A	T	A	A	T	G	G	A	T	C	G	C	G	T	C	T	C	C	C	T	T	A	C	T	C	A	G	C	C	T	C	A	C	G	A	A	T	A	G	C	G
J1977006	G	C	C	C	A	G	C	C	A	T	A	A	T	G	G	A	T	C	G	C	G	T	C	T	C	C	C	T	T	A	C	T	C	A	G	C	C	T	C	A	C	G	A	A	T	A	G	C	G
J1978002	G	C	C	C	A	G	C	C	A	T	A	A	C	G	G	A	C	C	G	T	G	T	C	G	C	C	C	T	T	A	C	T	C	A	G	C	C	C	C	A	C	A	A	G	T	A	G	C	G
J1994008	G	C	C	C	A	G	C	C	A	T	A	A	T	G	G	A	T	C	G	C	G	T	C	T	C	C	C	T	T	A	C	T	C	A	G	C	C	T	C	A	C	G	A	A	T	A	G	C	G
K1972004	G	C	?	C	A	G	C	C	A	T	A	A	T	G	G	A	T	C	G	C	G	T	?	T	C	C	C	T	C	A	C	T	C	A	G	C	C	T	C	A	C	G	A	A	T	A	?	?	G
K1973001	G	C	C	C	A	G	C	C	A	T	A	A	T	G	G	A	T	C	G	C	G	T	C	T	C	C	C	?	C	A	C	T	C	A	G	C	C	T	C	A	C	G	A	A	T	A	G	C	G
K1973003	G	C	?	C	A	G	C	C	A	T	A	A	T	G	G	A	T	C	G	C	G	T	?	T	C	C	C	T	C	A	C	T	C	A	G	C	C	T	C	A	C	G	A	A	T	A	G	C	G
L1970002	G	C	?	A	A	T	C	A	A	T	A	A	C	G	A	G	T	C	G	C	G	T	C	G	T	C	C	T	T	T	C	G	C	A	G	C	C	C	C	C	C	G	A	G	T	G	G	A	A
L1970009	G	C	?	A	A	T	C	C	A	T	A	A	C	G	A	G	T	C	G	C	G	T	C	G	T	C	C	T	T	T	C	G	C	A	G	C	C	C	C	C	C	G	A	G	T	G	G	A	A
L1970015	G	C	?	A	A	T	C	A	A	T	A	A	C	G	A	G	T	C	G	C	G	T	C	G	T	C	C	T	T	T	C	G	C	A	G	C	C	C	C	C	C	G	A	G	T	G	G	A	A
M1987002	G	C	T	A	A	T	C	C	A	T	A	A	C	G	?	G	T	C	G	C	G	T	C	G	C	C	C	T	T	T	C	G	C	A	G	C	C	C	C	C	C	G	A	G	T	G	G	A	?
M1997005	G	?	T	A	A	T	C	C	A	T	?	A	C	G	A	G	T	C	G	C	G	T	C	G	C	C	C	T	T	T	C	G	C	A	G	C	C	C	C	C	C	G	A	G	T	G	G	A	A
M2001009	G	C	?	?	?	?	?	?	A	T	A	A	?	?	A	G	T	?	?	C	?	?	C	?	C	C	?	?	?	?	C	G	C	?	?	?	C	C	C	?	C	?	?	G	T	?	G	A	A
M2001010	G	C	T	?	?	?	C	?	A	T	A	A	C	?	A	G	T	C	G	C	G	T	C	G	C	C	C	T	T	T	C	G	C	A	G	C	C	C	C	C	C	G	A	G	T	G	G	A	A
PEST-F	G	T	T	A	A	G	T	C	?	?	T	?	C	G	G	?	T	T	T	?	G	C	C	G	C	?	?	G	T	T	A	G	T	?	G	?	C	?	?	A	C	G	G	G	C	G	T	C	G
No. ambiguous bases	8	14	9	14	11	12	3	13	7	5	14	5	5	13	11	7	0	4	3	6	5	3	4	4	4	6	10	7	11	14	4	2	1	14	4	9	1	6	7	4	2	6	11	4	1	11	3	5	12
[truncated: 587 more columns]

## Sheet: Table S1b
Table S1b
SNPs for the intersection of the Morelli et al. and Bos et al. datasets removed by the 95% partial deletion filter
CO92_POS	855	4089	4225	20252	34810	42303	47957	61685	74831	75697	90931	102510	133269	143776	167803	168535	171062	188576	204205	213082	250903	262564	286528	303243	322671	324986	337523	367638	374263	387471	440655	445674	449523	455290	471201	472754	483293	488947	511653	511678	515976	525887	545082	568345	574078	574669	593038	616868	621314
E. Smith.	C	G	T	G	A	C	C	G	T	G	A	G	G	A	C	A	T	C	A	T	G	C	T	G	G	G	C	G	C	C	C	A	C	A	G	G	?	A	G	?	G	A	C	T	G	C	T	A	G
NC_003143	C	G	T	G	A	C	C	G	T	G	A	G	G	A	C	A	T	C	A	T	G	C	A	G	G	G	C	G	C	C	C	A	C	A	G	G	T	A	G	C	G	A	C	T	G	C	T	A	G
NC_004088	C	G	T	G	A	C	C	G	T	G	T	G	G	A	T	A	T	C	A	T	G	C	T	G	G	G	C	G	C	C	C	A	A	A	G	G	T	A	G	C	G	A	C	A	G	T	T	A	G
NC_005810	C	G	T	A	A	C	A	G	T	G	A	G	G	A	C	A	T	C	A	C	G	C	T	T	G	G	T	G	A	C	C	G	C	A	G	G	C	G	G	T	G	A	C	T	G	C	T	A	G
NC_006155	C	G	T	G	A	C	C	G	T	G	A	G	G	G	C	A	T	C	A	C	G	C	T	G	G	G	C	G	C	C	C	G	C	A	G	G	C	G	G	C	G	A	C	T	G	C	T	A	G
NC_008149	T	G	T	G	A	C	C	C	T	G	A	G	G	A	C	A	T	C	A	T	G	A	T	G	G	G	C	G	C	C	T	A	C	A	G	G	T	A	G	C	G	A	C	T	G	C	T	A	G
NC_008150	C	G	T	G	A	C	C	G	T	G	A	G	G	A	C	G	T	C	A	T	G	C	T	G	G	G	C	A	C	C	C	A	C	A	G	G	T	A	T	C	G	T	C	T	A	C	T	A	G
NC_009381	C	G	T	G	G	C	C	G	C	G	A	G	A	G	C	A	T	T	G	C	A	C	T	G	A	C	C	G	C	T	C	G	C	A	G	T	C	G	G	C	G	A	T	T	G	C	G	T	A
NC_009708	C	G	T	G	A	C	C	G	T	G	A	G	G	G	C	A	T	C	A	C	G	C	T	G	G	G	C	G	C	C	C	G	C	A	G	G	C	G	G	C	G	A	C	T	G	C	T	A	G
NC_010159	C	G	T	G	A	C	C	G	T	G	A	G	G	A	C	A	T	C	A	C	G	C	T	G	G	G	C	G	C	C	C	G	C	A	G	G	C	G	G	C	G	A	C	T	G	C	T	A	G
NC_014029	C	G	T	G	A	C	C	G	T	G	A	G	G	A	C	A	T	C	A	T	G	C	T	G	G	G	C	G	C	C	C	A	C	A	G	G	T	A	G	C	G	A	C	T	G	C	T	A	G
NZ_AAOS02000	C	A	T	G	A	C	C	G	T	G	A	G	G	A	C	A	T	C	A	?	G	C	A	G	G	G	C	G	C	C	C	A	C	G	G	G	T	A	G	C	G	A	C	T	G	C	T	A	G
NZ_AAUB01000	C	G	T	G	A	C	C	?	T	G	A	G	G	A	C	A	T	C	A	?	G	C	A	G	G	G	C	G	C	C	C	A	C	A	G	G	G	A	G	C	G	A	C	T	?	C	?	A	G
NZ_AAYR01000	C	G	T	G	A	C	C	G	T	A	A	G	G	A	C	G	T	C	A	T	G	C	T	G	G	G	C	A	C	C	C	A	C	A	G	G	T	A	T	C	G	T	C	T	A	C	T	A	G
NZ_AAYS01000	C	A	T	G	A	C	C	G	T	G	A	G	G	A	C	A	T	C	A	?	G	C	A	G	G	G	C	G	C	C	C	A	C	A	G	G	T	A	G	C	G	A	C	T	G	C	T	A	G
NZ_AAYT01000	C	G	T	G	A	C	C	G	T	G	T	G	G	A	T	A	T	C	A	T	G	C	T	G	G	G	C	G	C	C	C	A	C	A	G	G	T	A	G	C	G	A	C	T	G	T	T	A	G
NZ_AAYU01000	C	G	T	G	A	C	C	G	T	G	A	G	?	A	C	A	T	C	A	T	G	C	T	G	G	G	C	G	C	C	C	A	C	A	G	G	T	A	G	C	G	A	C	T	G	C	T	A	G
NZ_AAYV01000	C	G	T	G	A	C	C	G	T	G	A	G	G	A	C	A	T	C	A	T	G	C	T	G	G	G	C	G	C	C	C	A	C	A	G	G	T	A	G	C	G	A	C	T	G	C	T	A	G
NZ_ABAT01000	C	G	T	G	A	T	C	G	T	G	A	A	G	A	C	A	G	C	A	T	G	C	A	G	G	G	C	G	C	C	C	A	C	A	G	G	T	A	G	C	A	A	C	T	G	C	T	A	G
NZ_ABCD01000	C	G	A	G	A	C	C	G	T	G	A	G	G	A	C	A	T	C	A	T	G	C	A	G	G	G	C	G	C	C	C	A	C	A	T	G	T	A	G	C	G	A	C	T	G	C	T	A	G
NZ_ACNQ01000	T	G	T	G	A	C	C	C	T	G	A	G	G	A	C	A	T	C	A	T	G	A	T	G	G	G	C	G	C	C	T	A	C	A	G	G	T	A	G	C	G	A	C	T	G	C	T	A	G
NZ_ACNS01000	C	G	T	G	A	C	C	G	T	G	A	G	G	A	C	A	T	C	A	T	G	C	A	G	G	G	C	G	C	C	C	A	C	A	G	G	T	A	G	C	G	A	C	T	G	C	T	A	G
B2003003	C	G	T	G	A	C	C	G	T	G	A	G	G	A	C	A	T	?	A	T	G	C	T	G	G	G	C	G	C	C	C	A	C	A	G	G	?	A	?	C	G	A	C	T	G	C	T	A	G
E1979001	C	G	T	G	A	C	C	G	T	G	A	G	G	A	C	A	T	?	A	T	G	C	T	G	G	G	C	G	C	C	C	A	C	A	G	G	?	A	?	C	G	A	C	T	G	C	T	A	G
F1991016	C	G	T	G	A	T	C	G	T	G	A	A	G	A	C	A	G	?	A	T	G	C	A	G	G	G	C	G	C	C	C	A	C	A	G	G	?	A	?	C	A	A	C	T	G	C	T	A	G
K1973002	C	G	T	G	A	C	C	G	T	G	T	G	G	A	T	A	T	?	A	T	G	C	T	G	G	G	C	G	C	C	C	A	C	A	G	G	?	A	?	C	G	A	C	T	G	T	T	A	G
1107	C	A	T	G	A	C	C	G	T	G	A	G	G	A	C	A	T	?	A	T	G	C	A	G	G	G	C	G	C	C	C	A	C	A	G	G	?	A	?	C	G	A	C	T	G	C	T	A	G
1220	C	G	T	G	A	T	C	G	T	G	A	G	G	A	C	A	G	?	A	T	G	C	A	G	G	G	C	G	C	C	C	A	C	A	G	G	?	A	?	C	A	A	C	T	G	C	T	A	G
1221	C	G	T	?	A	T	C	G	T	?	A	G	G	A	C	A	G	?	A	T	G	C	A	G	G	G	C	G	C	C	C	A	C	A	G	G	?	A	?	C	A	A	C	T	G	C	T	A	G
1268	C	G	T	?	A	T	C	?	T	?	?	G	G	A	?	A	G	?	A	T	G	?	A	G	G	?	C	G	C	C	C	?	?	A	G	?	?	A	G	C	A	A	C	?	?	C	T	A	G
1283	C	A	?	G	A	C	C	G	T	G	A	?	G	A	C	A	T	?	A	T	G	C	?	?	G	G	C	G	?	C	C	A	C	A	?	G	?	A	?	C	G	?	C	T	G	C	?	A	?
1284	?	?	T	G	?	?	?	G	?	G	?	G	?	A	C	A	?	?	?	T	?	C	A	G	?	G	?	?	C	?	C	A	?	A	G	G	?	?	?	C	?	A	?	?	G	C	T	A	G
1285	?	?	T	G	?	?	?	G	?	G	A	?	?	A	C	?	?	?	?	T	?	C	?	?	?	G	?	?	C	?	?	A	C	A	G	G	?	?	?	C	?	A	?	T	G	?	?	A	?
1286	C	A	?	G	A	C	C	G	T	G	A	G	G	A	C	A	T	?	A	T	G	C	A	?	G	G	C	G	?	C	C	A	C	A	?	G	?	A	?	C	G	?	C	T	G	C	T	A	G
1287	C	A	T	G	A	C	C	G	T	G	A	G	G	A	C	A	T	?	A	?	G	C	A	G	G	G	C	G	C	C	C	A	C	?	G	G	?	A	G	C	G	A	C	T	G	C	T	A	G
1288	C	A	T	G	A	C	C	G	T	G	A	G	G	A	C	A	T	C	A	T	G	C	A	G	G	G	C	G	C	C	C	A	C	A	G	G	?	A	?	C	G	A	C	T	G	C	T	A	G
1289	C	A	T	?	A	C	C	G	T	?	A	G	G	A	C	A	T	?	A	T	G	C	A	G	G	G	C	G	C	C	C	A	C	A	G	G	?	A	?	C	G	A	C	T	G	C	T	A	G
1290	C	A	T	G	A	C	C	G	T	G	?	G	G	A	C	A	T	?	A	T	G	C	A	G	G	G	C	G	C	C	C	A	?	A	G	G	?	A	?	C	G	A	C	?	G	C	T	A	G
1291	C	A	T	G	A	C	C	G	T	G	A	G	G	A	C	A	T	?	A	T	G	C	A	G	G	G	C	G	C	C	C	A	C	A	G	G	?	A	?	C	G	A	C	T	G	C	T	A	G
1292	C	A	T	G	A	C	C	G	T	G	A	G	G	?	C	?	T	?	A	T	G	C	A	G	G	G	C	G	C	C	?	A	C	A	G	G	?	A	?	C	G	A	C	T	G	?	T	A	G
1294	C	A	T	G	A	C	C	G	T	G	A	G	G	?	C	A	T	?	A	?	G	C	A	G	G	G	C	G	C	C	C	A	C	A	G	G	?	A	?	C	G	A	C	T	G	C	T	A	G
1296	C	A	T	G	A	C	C	G	T	G	A	G	G	?	C	A	T	?	A	T	G	C	A	G	G	G	C	G	C	C	C	A	C	A	G	G	?	A	?	C	G	A	C	T	G	C	T	A	G
1297	?	?	T	G	?	?	?	G	?	G	A	G	?	A	C	?	?	?	?	T	?	C	A	G	?	G	?	?	C	?	?	A	C	A	G	G	?	?	?	C	?	A	?	T	G	?	T	A	G
1309	?	?	T	G	?	?	?	G	?	G	A	G	?	A	C	?	?	?	?	T	?	C	A	G	?	G	?	?	C	?	?	A	C	A	G	G	?	?	?	C	?	A	?	T	G	?	T	A	G
1322	C	A	?	G	A	C	C	G	T	G	T	G	G	A	C	A	T	?	A	T	G	C	A	?	G	G	C	G	?	C	?	A	C	A	?	G	?	A	?	C	G	?	C	T	G	C	T	A	G
1324	C	A	T	G	A	C	C	G	T	G	A	G	G	?	C	A	T	C	A	T	G	C	A	G	G	G	C	G	C	C	C	A	C	A	G	G	?	A	?	C	G	A	C	T	G	C	T	A	G
1339	C	A	?	G	A	C	C	G	T	G	A	G	G	A	C	A	T	?	A	T	G	C	A	?	G	G	C	G	?	C	C	A	C	A	?	G	?	A	?	C	G	?	C	T	G	C	T	A	G
1343	C	A	T	G	A	C	C	G	T	G	A	G	G	A	C	A	T	?	A	T	G	C	A	G	G	G	C	G	C	C	C	A	C	A	G	G	?	A	?	C	G	A	C	T	G	C	T	A	G
1344	C	A	T	G	A	C	C	G	T	G	A	G	G	?	C	A	T	?	A	T	G	C	A	G	G	G	C	G	C	C	C	A	C	A	G	G	?	A	?	C	G	A	C	T	G	C	T	A	G
1349	C	A	T	G	A	C	C	G	T	G	A	G	G	A	C	A	T	?	A	T	G	C	A	G	G	G	C	G	C	C	C	A	C	A	G	G	?	A	?	C	G	A	C	T	G	C	T	A	G
1361	C	A	T	G	A	C	C	G	T	G	A	G	G	A	C	A	T	?	A	T	G	C	A	G	G	G	C	G	C	C	C	A	C	A	G	G	?	A	?	C	G	A	C	T	G	C	T	A	G
1369	C	A	T	G	A	C	C	G	T	G	A	G	G	A	C	A	T	?	A	T	G	C	A	G	G	G	C	G	C	C	C	A	C	A	G	G	?	A	?	C	G	A	C	T	G	C	T	A	G
1464	C	A	T	G	A	C	C	G	T	G	A	G	G	?	C	A	T	?	A	T	G	C	A	G	G	G	C	G	C	C	C	A	C	A	G	G	?	A	?	C	G	A	C	T	G	C	T	A	G
1478	C	A	T	G	A	C	C	G	T	G	A	?	G	?	C	A	T	?	A	?	G	C	?	G	G	G	C	G	C	C	C	A	C	?	G	G	?	A	?	C	G	A	C	T	G	C	?	A	?
1484	C	A	T	?	A	C	C	G	T	?	A	G	G	A	C	A	T	?	A	T	G	C	A	G	G	G	C	G	C	C	C	A	C	A	G	G	?	A	?	C	G	A	C	T	G	C	T	A	G
1488	C	A	T	G	A	C	C	G	T	G	A	G	G	A	C	?	T	?	A	T	G	C	A	G	G	G	C	G	C	C	?	A	C	A	G	G	?	A	?	C	G	A	C	T	G	?	T	A	G
1489	C	A	?	G	A	C	C	G	T	G	A	G	G	A	C	A	T	?	A	T	G	C	A	?	G	G	C	G	?	C	?	A	C	A	?	G	?	A	?	C	G	?	C	T	G	C	T	A	G
1490	C	A	T	G	A	C	C	G	T	G	A	G	G	A	C	A	T	?	A	T	G	C	A	G	G	G	C	G	C	C	C	A	C	A	G	G	?	A	?	C	G	A	C	T	G	C	T	A	G
1492	C	A	?	G	A	C	C	G	T	?	A	G	G	A	C	A	T	C	A	T	G	C	A	?	G	G	C	G	?	C	C	A	C	A	?	G	?	A	?	C	G	?	C	T	G	C	T	A	G
1494	C	A	T	?	A	C	C	G	T	?	A	G	G	A	C	A	T	?	A	T	G	C	A	?	G	G	C	G	C	C	C	A	C	A	G	G	?	A	?	C	G	A	C	T	G	C	T	A	G
1496	C	A	T	G	A	C	C	G	T	G	A	G	G	A	C	A	T	?	A	T	G	C	A	G	G	G	C	G	C	C	C	A	C	A	G	G	?	A	?	C	G	A	C	T	G	C	T	A	G
1497	C	A	T	G	A	C	C	G	T	G	A	G	G	?	C	A	T	?	A	?	G	C	A	G	G	G	C	G	C	C	C	A	C	?	G	G	?	A	?	C	G	A	C	T	G	C	T	A	G
1498	C	A	T	G	A	C	C	G	T	G	A	G	G	A	C	A	T	?	A	T	G	C	A	G	G	G	C	G	C	C	C	A	C	A	G	G	?	A	?	C	G	A	C	T	G	C	T	A	G
1510	C	A	T	G	A	C	C	G	T	G	A	G	G	?	C	A	T	?	A	T	G	C	A	?	G	G	C	G	C	C	C	A	C	A	G	G	?	A	?	C	G	A	C	T	G	C	T	A	G
1511	C	A	T	G	A	C	C	G	T	G	?	G	G	A	C	A	T	C	A	?	G	C	A	G	G	G	C	G	C	C	C	A	?	A	G	G	?	A	?	C	G	A	C	?	G	C	T	A	G
1512	C	A	T	G	A	C	C	G	T	G	?	G	G	A	C	A	T	?	A	T	G	C	A	G	G	G	C	G	C	C	C	A	?	A	G	G	?	A	?	C	G	A	C	?	G	C	T	A	G
1513	C	A	T	G	A	C	C	G	T	G	A	G	G	A	C	A	T	?	A	T	G	C	A	G	G	G	C	G	C	C	C	A	C	A	G	G	?	A	?	C	G	A	C	T	G	C	T	A	G
1514	C	A	T	?	A	C	C	G	T	?	A	G	G	A	C	A	T	?	A	T	G	C	A	G	G	G	C	G	C	C	C	A	C	A	G	G	?	A	?	C	G	A	C	T	G	C	T	A	G
1521	C	A	T	?	A	C	C	G	T	?	A	G	G	A	C	A	T	?	A	T	G	C	A	?	G	G	C	G	C	C	?	A	C	A	G	G	?	A	?	C	G	A	C	T	G	C	T	A	G
1522	C	A	T	G	A	C	C	G	T	G	A	G	G	A	C	A	T	?	A	T	G	C	A	G	G	G	C	G	C	C	C	A	C	A	G	G	?	A	?	C	G	A	C	T	G	C	T	A	G
1535	C	G	T	G	A	C	C	G	T	G	?	G	G	A	C	A	T	?	A	T	G	C	A	G	G	G	C	G	C	C	C	A	?	A	G	G	?	A	?	C	G	A	C	?	G	C	T	A	G
1537	C	G	T	G	A	C	C	G	T	G	A	G	G	A	C	A	T	?	A	T	G	C	A	G	G	G	C	G	C	C	C	A	C	A	G	G	?	A	?	C	G	A	C	T	G	C	T	A	G
1538	C	G	T	G	A	C	C	G	T	G	?	G	G	A	C	A	T	?	A	T	G	C	A	G	G	G	C	G	C	C	C	A	?	A	G	G	?	A	?	C	G	A	C	?	G	C	T	A	G
1540	C	G	?	G	A	C	C	G	T	G	?	G	G	A	C	A	T	?	A	T	G	C	A	?	G	G	C	G	?	C	C	A	?	A	?	G	?	A	?	C	G	?	C	?	G	C	T	A	G
1541	C	G	T	G	A	C	C	G	T	G	A	?	G	A	C	A	T	?	A	?	G	C	?	G	G	G	C	G	C	C	C	A	C	?	G	G	?	A	?	C	G	A	C	T	G	C	?	A	?
1554	C	G	?	G	A	C	C	G	T	G	?	G	G	A	C	A	T	?	A	T	G	C	A	?	G	G	C	G	?	C	C	A	?	A	?	G	?	A	?	C	G	?	C	?	G	C	T	A	G
1588	C	G	T	G	A	C	C	G	T	G	?	?	G	A	C	A	T	?	A	?	G	C	?	G	G	G	C	G	C	C	C	A	?	?	G	G	?	A	?	C	G	A	C	?	G	C	?	A	?
1589	C	G	T	?	A	C	C	G	T	?	A	?	G	A	?	A	T	?	A	T	G	?	?	G	G	G	C	G	C	C	C	?	C	A	G	?	?	A	?	C	G	A	C	T	?	C	?	A	?
1593	?	?	?	?	?	?	?	G	?	?	?	?	?	A	C	A	?	?	?	T	?	C	?	?	?	G	?	?	?	?	C	?	?	A	G	?	?	?	?	C	?	?	?	?	?	C	?	A	G
1594	C	G	?	G	A	C	C	G	T	G	T	G	G	A	T	A	T	C	A	T	G	C	T	?	G	G	C	G	?	C	C	A	A	A	?	G	?	A	G	C	G	?	C	A	G	T	T	A	G
1596	C	A	T	G	A	C	C	G	T	G	?	?	G	A	C	A	T	?	A	T	G	C	?	G	G	G	C	G	C	C	C	A	?	A	G	G	?	A	?	C	G	A	C	?	G	C	?	A	?
1599	C	A	T	G	A	C	?	G	T	G	?	G	G	A	C	A	T	?	A	T	G	C	A	G	G	G	?	G	C	C	C	A	?	A	?	G	?	A	?	C	G	A	C	?	G	C	T	A	G
1600	C	A	T	G	A	C	C	G	T	G	A	G	G	A	C	A	T	?	A	T	G	C	A	G	G	G	C	G	C	C	C	A	C	A	G	G	?	A	?	C	G	A	C	T	G	C	T	A	G
1601	C	A	T	G	A	C	C	G	T	G	?	G	G	A	C	A	T	?	A	T	G	C	A	G	G	G	C	G	C	C	C	A	?	A	G	G	?	A	?	C	G	A	C	?	G	C	T	A	G
1602	C	A	?	G	A	C	C	G	T	G	A	G	G	A	C	A	T	?	A	T	G	C	A	?	G	G	C	G	?	C	C	A	C	A	?	G	?	A	?	C	G	?	C	T	G	C	T	A	G
1633	C	G	T	G	A	T	C	G	T	G	A	G	G	A	C	A	G	?	A	T	G	C	A	G	G	G	C	G	C	C	C	A	C	A	G	G	?	A	?	?	A	A	C	T	G	C	T	A	G
1637	C	G	T	G	A	T	C	G	T	G	A	G	G	A	C	A	G	C	A	T	G	C	A	G	G	G	C	G	C	C	C	A	C	A	G	G	?	A	?	C	A	A	C	T	G	C	T	A	G
1697	C	A	T	G	A	C	C	G	T	G	A	?	G	?	C	A	T	?	A	?	G	C	?	G	G	G	C	G	C	C	C	A	C	?	G	G	?	A	?	C	G	A	C	T	G	C	?	A	?
1871	C	G	T	G	A	C	C	G	T	G	A	G	G	A	?	A	T	?	A	T	G	?	A	G	G	G	C	G	C	C	C	?	C	A	G	?	?	A	?	C	G	A	C	T	?	C	T	A	G
1872	C	G	?	G	A	C	C	G	T	G	?	G	G	A	C	A	T	?	A	T	G	C	A	?	G	G	C	G	?	C	C	A	?	A	?	G	?	A	?	C	G	?	C	?	G	C	T	A	G
1873	C	G	T	G	A	C	C	G	T	G	A	G	G	A	C	A	T	?	A	T	G	C	A	G	G	G	C	G	C	C	C	A	C	A	G	G	?	A	?	C	G	A	C	T	G	C	T	A	G
1874	?	?	T	G	?	?	?	G	?	G	?	G	?	A	?	A	?	?	?	T	?	?	A	G	?	G	?	?	C	?	C	?	?	A	G	?	?	?	?	C	?	A	?	?	?	C	T	?	G
1875	C	G	T	?	A	C	C	?	T	?	A	G	G	A	?	A	T	?	A	T	G	?	A	G	G	?	C	G	C	C	C	?	C	A	G	?	?	A	?	C	G	A	C	T	?	C	T	?	G
1893	C	A	T	?	A	C	C	?	T	?	A	G	G	A	?	A	T	?	A	T	G	?	A	G	G	?	C	G	C	C	C	?	C	A	G	?	?	A	?	C	G	A	C	T	?	C	T	?	G
1918	C	G	T	G	A	C	C	?	T	G	A	G	G	A	?	A	T	?	A	?	G	?	A	G	G	?	C	G	C	C	C	?	C	?	G	?	?	A	?	C	G	A	C	T	?	C	T	?	G
1919	C	G	T	?	A	C	C	G	T	?	?	G	G	A	C	A	T	?	A	?	G	C	A	G	G	G	C	G	C	C	C	A	?	A	G	G	?	A	?	C	G	A	C	?	G	C	T	A	G
1920	C	G	T	G	A	C	C	G	T	G	A	G	G	A	?	A	T	C	A	T	G	?	A	G	G	G	C	G	C	C	C	?	C	?	G	?	?	A	?	C	G	A	C	T	?	C	T	?	G
1970006	C	G	T	A	A	C	A	G	T	G	A	G	G	A	C	A	T	?	A	C	G	C	?	T	G	G	T	G	A	C	C	G	C	A	G	G	?	G	?	T	G	A	C	T	G	C	T	A	G
240	C	A	T	G	A	C	C	?	T	G	A	G	G	A	C	A	T	?	A	T	G	C	A	G	G	?	C	G	C	C	C	A	C	A	G	G	?	A	G	C	G	A	C	T	G	C	T	?	G
241	C	A	T	G	A	C	C	?	T	G	A	G	G	A	C	A	T	?	A	T	G	C	A	G	G	?	C	G	C	C	C	A	C	A	G	G	?	A	?	C	G	A	C	T	G	C	T	?	G
244	C	A	T	G	A	C	C	G	T	G	A	G	G	A	C	A	T	?	A	T	G	C	A	G	G	G	C	G	C	C	C	A	C	A	G	G	?	A	?	?	G	A	C	T	G	C	T	A	G
245	C	A	T	G	A	C	C	G	T	G	A	G	G	A	C	A	T	?	A	T	G	C	A	G	G	G	C	G	C	C	C	A	C	A	G	G	?	A	?	C	G	A	C	T	G	C	T	A	G
246	C	A	T	G	A	C	C	G	T	G	A	G	G	A	C	A	T	C	A	T	G	C	A	G	G	G	C	G	C	C	C	A	C	A	G	G	?	A	?	C	G	A	C	T	G	C	T	A	G
247	C	A	T	G	A	C	C	?	T	G	A	G	G	A	?	A	T	?	A	T	G	?	A	G	G	?	C	G	C	C	C	?	C	A	G	?	?	A	?	C	G	A	C	T	?	C	T	?	G
248	C	A	?	G	A	C	C	?	T	G	A	G	G	A	C	A	T	?	A	?	G	C	A	?	G	?	C	G	?	C	C	A	C	?	?	G	?	A	?	C	G	?	C	T	G	C	T	?	G
249	C	A	T	G	A	C	C	G	T	G	A	G	G	A	C	A	T	?	A	T	G	C	A	G	G	G	C	G	C	C	C	A	C	A	G	G	?	A	?	C	G	A	C	T	G	C	T	A	G
253	C	A	T	G	A	C	C	G	T	G	A	G	G	A	C	A	T	?	A	T	G	C	A	G	G	G	C	G	C	C	C	A	C	A	G	G	?	A	?	C	G	A	C	T	G	C	T	A	G
259	C	A	?	G	A	C	C	G	T	G	A	G	G	A	C	?	T	?	A	T	G	C	A	?	G	G	C	G	?	C	?	A	C	A	?	G	?	A	?	C	G	?	C	T	G	?	T	A	G
270	?	?	T	G	?	?	?	G	?	G	A	G	?	A	C	?	?	?	?	T	?	C	A	G	?	G	?	?	C	?	?	A	C	A	G	G	?	?	?	C	?	A	?	T	G	?	T	A	G
272	?	?	T	G	?	?	?	?	?	G	A	G	?	A	C	?	?	?	?	T	?	C	A	G	?	?	?	?	C	?	?	A	C	A	G	G	?	?	?	C	?	A	?	T	G	?	T	?	G
275	C	A	T	G	A	C	C	G	T	G	A	G	G	A	?	A	T	?	A	?	G	?	A	G	G	G	C	G	C	C	C	?	C	G	G	?	?	A	?	C	G	A	C	T	?	C	T	A	G
283	C	A	T	G	A	C	C	G	T	G	A	G	G	A	C	A	T	?	A	T	G	C	A	G	G	G	C	G	C	C	C	A	C	A	G	G	?	A	?	C	G	A	C	T	G	C	T	A	G
304	C	A	T	G	A	C	C	G	T	G	A	G	G	A	C	A	T	?	A	T	G	C	A	G	G	G	C	G	C	C	C	A	C	A	G	G	?	A	?	C	G	A	C	T	G	C	T	A	G
501	C	G	?	G	A	C	C	G	T	G	A	G	G	A	C	A	T	C	A	T	G	C	A	?	G	G	C	G	C	C	C	A	C	A	G	G	?	A	?	C	G	A	C	T	G	C	T	A	G
504	C	G	T	G	A	C	C	G	T	G	A	G	G	A	C	A	T	?	A	T	G	C	A	G	G	G	C	G	C	C	C	A	C	A	G	G	?	A	?	C	G	A	C	T	G	C	T	A	G
505	C	A	T	G	A	C	C	G	T	G	A	G	G	A	C	A	T	?	A	T	G	C	A	G	G	G	C	G	C	C	C	A	C	A	G	G	?	A	?	C	G	A	C	T	G	C	T	A	G
507	C	G	T	G	?	?	?	G	T	G	A	G	?	A	C	A	?	C	A	T	G	C	A	G	G	G	?	G	C	C	C	A	C	A	G	G	?	?	?	C	G	A	C	T	G	C	T	A	G
513	C	G	T	G	A	T	C	G	T	G	A	G	G	A	C	A	G	?	A	T	G	C	A	G	G	G	C	G	C	C	C	A	C	A	G	G	?	A	?	C	A	A	C	T	G	C	T	A	G
515	C	G	T	G	A	C	C	G	T	G	T	G	G	A	T	A	T	C	A	T	G	C	T	G	G	G	C	G	C	C	C	A	A	A	G	G	?	A	?	C	G	A	C	A	G	T	T	A	G
516	C	G	T	G	?	?	?	G	T	G	T	G	G	A	T	A	?	C	A	T	G	C	T	G	G	G	C	G	C	C	C	A	A	A	G	G	?	?	?	C	G	A	C	A	G	T	T	A	G
517	C	G	T	G	A	C	C	G	T	G	T	G	G	A	T	A	T	C	A	T	G	C	T	G	G	G	C	G	C	C	C	A	A	A	G	G	?	A	G	C	G	A	C	A	G	T	T	A	G
518	C	G	T	G	A	C	C	G	T	G	T	G	G	A	T	A	T	?	A	T	G	C	T	G	G	G	C	G	C	C	C	A	A	A	G	G	?	A	G	C	G	A	C	A	G	T	T	A	G
519	C	G	T	G	A	C	C	G	T	G	T	G	G	A	T	A	T	C	A	T	G	C	T	G	G	G	C	G	C	C	C	A	A	A	G	G	?	A	G	C	G	A	C	A	G	T	T	A	G
520	C	G	T	G	A	C	C	G	T	G	T	G	G	A	T	A	T	C	A	T	G	C	T	G	G	G	C	G	C	C	C	A	A	A	G	G	?	A	G	C	G	A	C	A	G	T	T	A	G
521	C	A	T	G	A	C	C	G	T	G	A	G	G	A	C	A	T	?	A	T	G	C	A	G	G	G	C	G	C	C	C	A	C	A	G	G	?	A	?	C	G	A	C	T	G	C	T	A	G
523	C	G	T	G	A	C	C	G	T	G	A	G	G	A	C	A	T	C	A	?	G	C	A	G	G	G	C	G	C	C	C	A	C	A	G	G	?	A	?	C	G	A	C	T	G	C	T	A	G
524	C	G	T	G	A	C	C	G	T	G	A	G	G	A	C	A	T	?	A	T	G	C	A	G	G	G	C	G	C	C	C	A	C	A	G	G	?	A	?	C	G	A	C	T	G	C	T	A	G
527	C	G	T	G	A	C	C	G	T	G	A	G	G	A	C	A	T	C	A	T	G	C	A	G	G	G	C	G	C	C	C	A	C	A	G	G	?	A	G	C	G	A	C	T	G	C	T	A	G
528	C	A	T	G	A	C	C	G	T	G	A	G	G	A	C	A	T	?	A	T	G	C	A	G	G	G	C	G	C	C	C	A	C	A	G	G	?	A	?	C	G	A	C	T	G	C	T	A	G
529	?	?	T	G	?	?	?	G	?	G	A	G	?	A	C	A	?	?	?	T	?	C	A	G	?	G	?	?	C	?	C	A	C	A	G	G	?	?	?	C	?	A	?	T	G	C	T	A	G
532	?	?	T	G	?	?	?	G	?	G	A	G	?	A	C	A	?	C	?	T	?	C	A	G	?	G	?	?	C	?	C	A	C	A	G	G	?	?	G	C	?	A	?	T	G	C	T	A	G
535	C	G	T	G	A	T	C	G	T	G	A	G	G	A	C	?	G	?	A	T	G	C	A	G	G	G	C	G	C	C	?	A	C	A	G	G	?	A	G	C	A	A	C	T	G	?	T	A	G
536	C	G	T	G	A	C	C	G	T	G	A	G	G	A	C	A	T	?	A	T	G	C	T	G	G	G	C	G	C	C	C	A	C	A	G	G	?	A	?	C	G	A	C	T	A	C	T	?	G
537	C	G	T	G	A	C	C	?	T	G	A	G	G	A	C	A	T	C	A	?	G	C	T	G	G	?	C	G	C	C	C	A	C	A	G	G	?	A	G	C	G	A	C	T	A	C	T	?	G
538	C	G	T	G	A	C	C	G	T	G	A	G	G	A	C	?	T	?	A	T	G	C	T	G	G	G	C	G	C	C	?	A	C	A	G	G	?	A	G	C	G	A	C	T	A	?	T	?	G
539	C	G	T	G	A	C	C	G	T	G	A	G	G	A	C	A	T	?	A	T	G	C	T	G	G	G	C	G	C	C	C	A	C	A	G	G	?	A	G	C	G	A	C	T	A	C	T	A	G
540	C	G	T	G	A	C	C	G	T	G	A	G	G	A	C	A	T	?	A	T	G	C	T	G	G	G	C	G	C	C	C	A	C	A	G	G	?	A	G	C	G	A	C	T	A	C	T	A	G
541	T	G	T	G	A	C	C	G	T	G	A	G	G	A	C	A	T	?	A	T	G	A	T	G	G	G	C	G	C	C	T	A	C	A	G	G	?	A	?	C	G	A	C	T	G	C	T	A	G
542	C	G	T	G	A	C	C	G	T	G	A	G	G	A	C	A	T	?	A	T	G	C	T	G	G	G	C	G	C	C	C	A	C	A	G	G	?	A	?	C	G	A	C	T	A	C	T	?	G
543	C	G	T	G	A	C	C	?	T	G	A	G	G	A	C	A	T	C	A	T	G	C	T	G	G	?	C	G	C	C	C	A	C	A	G	G	?	A	?	C	G	A	C	T	A	C	T	?	G
544	C	G	T	G	A	C	C	G	T	G	A	G	G	A	C	A	T	C	A	T	G	C	T	G	G	G	C	G	C	C	C	A	C	A	G	G	?	A	?	C	G	T	C	T	A	C	T	A	G
545	C	G	T	G	A	C	C	G	T	G	A	G	G	A	C	A	T	?	A	T	G	C	T	G	G	G	C	G	C	C	C	A	C	A	G	G	?	A	?	C	G	T	C	T	A	C	T	A	G
546	?	?	T	G	?	?	?	C	?	G	A	G	?	A	C	A	?	C	?	T	?	?	T	G	?	G	?	?	C	?	T	A	C	A	G	G	?	?	?	C	?	A	?	T	G	C	T	A	G
547	?	?	T	G	?	?	?	G	?	G	A	G	?	A	C	?	?	C	?	T	?	C	T	G	?	G	?	?	C	?	?	A	C	A	G	G	?	?	?	C	?	T	?	T	A	?	T	A	G
548	C	G	T	G	A	C	C	G	T	G	A	G	G	A	C	A	T	?	A	T	G	C	T	G	G	G	C	G	C	C	C	A	C	A	G	G	?	A	?	C	G	T	C	T	A	C	T	A	G
549	C	G	T	G	A	C	C	G	T	G	A	G	G	A	C	G	T	?	A	T	G	C	T	G	G	G	C	A	C	C	C	A	C	A	G	G	?	A	?	C	G	T	C	T	A	C	T	A	G
550	C	G	T	G	A	C	C	G	T	G	A	G	G	A	C	A	T	C	A	T	G	C	T	G	G	G	C	G	C	C	C	A	C	A	G	G	?	A	?	C	G	T	C	T	A	C	T	A	G
551	C	G	T	G	A	C	C	G	T	G	A	G	G	A	C	A	T	?	A	T	G	C	T	G	G	G	C	G	C	C	C	A	C	A	G	G	?	A	?	C	G	T	C	T	A	C	T	A	G
552	C	G	T	G	A	C	C	G	T	G	A	G	G	A	C	A	T	?	A	T	G	C	T	G	G	G	C	G	C	C	C	A	C	A	G	G	?	A	?	C	G	T	C	T	A	C	T	A	G
553	C	G	T	G	A	C	C	G	T	G	A	G	G	A	C	A	T	?	A	T	G	C	T	G	G	G	C	G	C	C	C	A	C	A	G	G	?	A	?	C	G	T	C	T	A	C	T	A	G
554	C	G	T	G	A	C	C	G	T	G	A	G	G	A	C	A	T	?	A	?	G	C	T	G	G	G	C	G	C	C	C	A	C	A	G	G	?	A	?	C	G	T	C	T	A	C	T	A	G
556	C	G	T	G	A	C	C	G	T	G	T	G	G	A	T	A	T	C	A	T	G	C	T	G	G	G	C	G	C	C	C	A	A	A	G	G	?	A	?	C	G	A	C	A	G	T	T	A	G
557	C	G	T	G	A	C	C	G	T	G	T	G	G	A	T	A	T	C	A	T	G	C	T	G	G	G	C	G	C	C	C	A	A	A	G	G	?	A	?	C	G	A	C	A	G	T	T	?	G
558	?	?	T	G	?	?	?	G	?	G	T	G	?	A	T	A	?	C	?	T	?	C	T	G	?	G	?	?	C	?	C	A	A	A	G	G	?	?	?	C	?	A	?	A	G	T	T	A	G
559	?	?	T	G	?	?	?	G	?	G	T	G	?	A	T	A	?	?	?	T	?	C	T	G	?	G	?	?	C	?	C	A	A	A	G	G	?	?	?	?	?	A	?	A	G	T	T	A	G
560	C	G	T	G	A	C	C	G	T	G	T	G	G	A	T	A	T	?	A	T	G	C	T	G	G	G	C	G	C	C	C	A	A	A	G	G	?	A	?	C	G	A	C	A	G	T	T	A	G
561	C	G	T	G	A	C	C	G	T	G	T	G	G	A	T	A	T	C	A	T	G	C	T	G	G	G	C	G	C	C	C	A	A	A	G	G	?	A	?	C	G	A	C	A	G	T	T	A	G
562	C	G	T	G	A	C	C	G	T	G	T	G	G	A	T	A	T	C	A	T	G	C	T	G	G	G	C	G	C	C	C	A	A	A	G	G	?	A	?	C	G	A	C	A	G	T	T	A	G
563	C	G	T	G	A	C	C	G	T	G	T	G	G	A	T	A	T	?	A	T	G	C	T	G	G	G	C	G	C	C	C	A	A	A	G	G	?	A	?	C	G	A	C	A	G	T	T	A	G
565	C	G	T	G	A	C	C	G	T	G	T	G	G	A	T	A	T	C	A	T	G	C	T	G	G	G	C	G	C	C	C	A	A	A	G	G	?	A	?	C	G	A	C	A	G	T	T	A	G
566	C	G	T	G	A	C	C	G	T	G	A	G	G	A	C	A	T	?	A	T	G	C	T	G	G	G	C	G	C	C	C	A	C	A	G	G	?	A	?	C	G	A	C	T	A	C	T	?	G
568	C	G	T	G	A	C	C	G	T	G	A	G	G	A	C	A	T	?	A	T	G	C	A	G	G	G	C	G	C	C	C	A	C	A	G	G	?	A	?	C	G	A	C	T	G	C	T	A	G
571	C	G	T	G	A	C	C	G	T	G	A	G	G	A	C	A	T	?	A	T	G	C	A	G	G	G	C	G	C	C	C	A	C	A	G	G	?	A	?	C	G	A	C	T	G	C	T	A	G
573	C	G	T	G	A	C	C	G	T	G	A	G	G	A	C	A	T	C	A	T	G	C	A	G	G	G	C	G	C	C	C	A	C	A	G	G	?	A	?	C	G	A	C	T	G	C	T	A	G
574	?	?	T	G	?	?	?	G	?	G	A	G	?	A	C	A	?	C	?	T	?	C	A	G	?	G	?	?	C	?	C	A	C	A	G	G	?	?	?	C	?	A	?	T	G	C	T	A	G
577	?	?	T	G	?	?	?	G	?	G	A	G	?	A	C	A	?	?	?	T	?	C	A	G	?	G	?	?	C	?	C	A	C	A	G	G	?	?	?	C	?	A	?	T	G	C	T	A	G
578	C	G	T	G	A	C	C	G	T	G	A	G	G	A	C	A	T	C	A	T	G	C	A	G	G	G	C	G	C	C	C	A	C	A	G	G	?	A	?	C	G	A	C	T	G	C	T	A	G
579	C	G	T	G	A	C	C	?	T	G	?	?	G	A	?	A	T	C	A	T	G	?	?	G	G	?	C	G	C	C	C	?	?	A	G	?	?	A	?	C	G	A	C	?	?	C	?	?	?
585	C	A	?	G	A	C	C	G	T	G	A	G	G	A	C	A	T	?	A	T	G	C	A	?	G	G	C	G	?	C	C	A	C	A	?	G	?	A	?	C	G	?	C	T	G	C	T	A	G
594	C	A	T	?	A	C	C	G	T	?	A	G	G	A	C	A	T	C	A	?	G	C	A	G	G	G	C	G	C	C	C	A	C	?	G	G	?	A	?	C	G	A	C	T	G	C	T	A	G
600	C	A	T	?	A	C	C	G	T	?	A	G	G	A	C	A	T	?	A	T	G	C	A	G	G	G	C	G	C	C	C	A	C	A	G	G	?	A	?	C	G	A	C	T	G	C	T	A	G
601	C	A	T	G	A	C	C	G	T	G	A	G	G	A	C	A	T	?	A	T	G	C	A	?	G	G	C	G	C	C	C	A	C	A	G	G	?	A	?	C	G	A	C	T	G	C	T	A	G
604	C	A	T	G	A	C	C	G	T	G	A	G	G	A	C	A	T	?	A	T	G	C	A	G	G	G	C	G	C	C	C	A	C	A	G	G	?	A	?	C	G	A	C	T	G	C	T	A	G
606	C	A	T	?	A	C	C	G	T	?	A	G	G	A	C	A	T	?	A	T	G	C	A	?	G	G	C	G	C	C	C	A	C	A	G	G	?	A	?	C	G	A	C	T	G	C	T	A	G
608	C	G	T	G	A	C	C	G	T	G	A	G	G	A	C	A	T	?	A	T	G	C	A	G	G	G	C	G	C	C	C	A	C	A	G	G	?	A	?	C	G	A	C	T	G	C	T	A	G
610	C	G	T	G	A	C	C	G	T	G	A	G	G	A	C	A	T	?	A	T	G	C	A	?	G	G	C	G	C	C	C	A	C	A	G	G	?	A	?	C	G	A	C	T	G	C	T	A	G
611	T	G	T	G	A	C	C	G	T	G	A	G	G	A	C	A	T	C	A	T	G	A	T	G	G	G	C	G	C	C	T	A	C	A	G	G	?	A	?	C	G	A	C	T	G	C	T	A	G
612	C	G	T	G	A	T	C	G	T	G	A	A	G	A	C	A	G	?	A	T	G	C	A	G	G	G	C	G	C	C	C	A	C	A	G	G	?	A	?	C	A	A	C	T	G	C	T	A	G
613	C	G	T	G	A	T	C	G	T	G	A	A	G	A	C	A	G	?	A	T	G	C	A	G	G	G	C	G	C	C	C	A	C	A	G	G	?	A	?	C	A	A	C	T	G	C	T	A	G
616	C	G	T	G	A	C	C	G	T	G	T	G	G	A	T	A	T	?	A	T	G	C	T	G	G	G	C	G	C	C	C	A	A	A	G	G	?	A	?	C	G	A	C	A	G	T	T	A	G
617	C	G	T	G	A	C	C	G	T	G	T	G	G	A	T	A	T	C	A	T	G	C	T	G	G	G	C	G	C	C	C	A	A	A	G	G	?	A	?	C	G	A	C	A	G	T	T	A	G
619	C	G	T	G	A	C	C	G	T	G	A	G	G	A	C	A	T	?	A	T	G	C	A	G	G	G	C	G	C	C	C	A	C	A	G	G	?	A	?	C	G	A	C	T	G	C	T	A	G
637	C	A	T	G	A	C	C	G	T	G	A	G	G	A	C	A	T	?	A	T	G	C	A	G	G	G	C	G	C	C	C	A	C	A	G	G	?	A	?	C	G	A	C	T	G	C	T	A	G
643	C	A	T	G	A	C	C	G	T	G	A	G	G	A	C	A	T	?	A	T	G	C	A	G	G	G	C	G	C	C	C	A	C	A	G	G	?	A	?	C	G	A	C	T	G	C	T	A	G
656	C	A	T	G	A	C	C	G	T	G	A	G	G	A	C	A	T	?	A	T	G	C	A	G	G	G	C	G	C	C	C	A	C	A	G	G	?	A	?	C	G	A	C	T	G	C	T	A	G
657	C	A	?	G	A	C	C	G	T	G	A	G	G	A	C	A	T	?	A	T	G	C	A	?	G	G	C	G	?	C	C	A	C	A	?	G	?	A	?	C	G	?	C	T	G	C	T	A	G
658	?	?	T	G	?	?	?	G	?	G	A	G	?	A	C	?	?	?	?	T	?	C	A	G	?	G	?	?	C	?	?	A	C	A	G	G	?	?	?	C	?	A	?	T	G	?	T	A	G
659	?	?	T	G	?	?	?	G	?	G	A	?	?	A	C	?	?	?	?	T	?	C	?	G	?	G	?	?	C	?	?	A	C	?	G	G	?	?	?	C	?	A	?	T	G	?	?	A	?
661	C	A	?	G	A	C	C	G	T	G	A	G	G	A	C	A	T	?	A	T	G	C	A	?	G	G	C	G	?	C	C	A	C	A	?	G	?	A	?	?	G	?	C	T	G	C	T	A	G
662	C	A	T	G	A	C	C	G	T	G	A	G	G	A	C	A	T	?	A	T	G	C	A	G	G	G	C	G	C	C	C	A	C	A	G	G	?	A	G	C	G	A	C	T	G	C	T	A	G
664	C	A	T	G	A	C	C	G	T	G	A	G	G	A	C	A	T	?	A	T	G	C	A	G	G	G	C	G	C	C	C	A	C	A	G	G	?	A	?	C	G	A	C	T	G	C	T	A	G
665	C	A	T	G	A	C	C	G	T	G	A	G	G	A	C	A	T	?	A	T	G	C	A	G	G	G	C	G	C	C	C	A	C	A	G	G	?	A	?	C	G	A	C	T	G	C	T	A	G
666	C	A	T	G	A	C	C	G	T	G	A	G	G	A	C	A	T	?	A	T	G	C	A	G	G	G	C	G	C	C	C	A	C	A	G	G	?	A	?	C	G	A	C	T	G	C	T	A	G
667	C	A	T	G	A	C	C	G	T	G	A	G	G	A	C	A	T	?	A	T	G	C	A	G	G	G	C	G	C	C	C	A	C	A	G	G	?	A	?	C	G	A	C	T	G	C	T	A	G
668	C	A	T	G	A	C	C	G	T	G	A	G	G	A	C	A	T	?	A	T	G	C	A	G	G	G	C	G	C	C	C	A	C	A	G	G	?	A	?	C	G	A	C	T	G	C	T	A	G
669	C	G	T	G	A	C	C	G	T	G	T	G	G	A	T	A	T	?	A	T	G	C	T	G	G	G	C	G	C	C	C	A	A	A	G	G	?	A	?	C	G	A	C	A	G	T	T	?	G
670	C	G	T	G	A	C	C	G	T	G	T	G	G	A	T	A	T	?	A	T	G	C	T	G	G	G	C	G	C	C	C	A	A	A	G	G	?	A	?	C	G	A	C	A	G	T	T	A	G
674	C	A	T	G	A	C	C	G	T	G	A	G	G	A	C	A	T	C	A	T	G	C	A	G	G	G	C	G	C	C	C	A	C	A	G	G	?	A	G	C	G	A	C	T	G	C	T	A	G
677	C	G	T	G	A	C	C	G	T	G	A	G	G	A	C	A	T	?	A	T	G	C	T	G	G	G	C	G	C	C	C	A	C	A	G	G	?	A	T	C	G	T	C	T	A	C	T	A	G
678	C	A	T	G	A	C	C	G	T	G	A	G	G	A	C	A	T	?	A	T	G	C	A	G	G	G	C	G	C	C	C	A	C	A	G	G	?	A	?	C	G	A	C	T	G	C	T	A	G
685	C	G	T	G	A	C	C	G	T	G	A	G	G	A	C	A	T	?	A	T	G	C	A	G	G	G	C	G	C	C	C	A	C	A	G	G	?	A	?	C	G	A	C	T	G	C	T	A	G
695	C	G	T	G	A	C	C	?	T	G	A	G	G	?	C	A	T	?	A	T	G	C	A	?	G	?	C	G	C	C	C	A	C	A	G	G	?	A	?	C	G	A	C	T	G	C	T	?	G
696	C	G	T	G	A	C	C	G	T	G	A	G	G	A	C	A	T	?	A	T	G	C	A	G	G	G	C	G	C	C	C	A	C	A	G	G	?	A	?	C	G	A	C	T	G	C	T	A	G
772	C	G	T	G	A	T	C	G	T	G	A	G	G	A	C	A	G	?	A	T	G	C	A	G	G	G	C	G	C	C	C	A	C	A	G	G	?	A	?	C	A	A	C	T	G	C	T	A	G
820	C	G	T	G	?	?	C	G	?	G	A	G	G	A	C	A	?	?	?	T	G	C	A	G	G	G	?	?	C	?	C	A	C	A	G	G	?	?	?	C	?	A	C	T	G	C	T	A	G
847	C	G	T	G	A	T	C	G	T	G	A	G	G	A	C	?	G	?	A	T	G	C	A	G	G	G	C	G	C	C	?	A	C	A	G	G	?	A	?	C	A	A	C	T	G	?	T	A	G
91001	C	G	T	A	A	C	A	?	T	G	A	G	G	A	?	?	T	?	A	C	G	?	T	T	G	?	T	G	A	C	?	?	C	A	G	?	?	G	?	?	G	A	C	T	?	?	T	?	G
989	C	G	T	G	A	T	C	G	T	G	A	G	G	A	C	A	G	C	A	T	G	C	A	G	G	G	C	G	C	C	C	A	C	A	G	G	?	A	?	C	A	A	C	T	G	C	T	A	G
A1956001	C	G	T	G	A	C	C	G	T	G	A	G	G	A	C	A	T	?	A	T	G	C	T	G	G	G	C	G	C	C	C	A	C	A	G	G	?	A	?	?	G	A	C	T	G	C	T	A	G
A1966002	C	G	?	G	A	C	C	G	T	G	A	G	G	A	C	A	T	?	A	T	G	C	T	?	G	G	C	G	?	C	C	A	C	A	?	G	?	G	?	C	G	?	C	T	G	C	T	A	G
A1966003	C	G	T	G	A	C	C	G	T	G	T	G	G	?	T	A	T	?	A	T	G	C	T	G	G	G	C	G	C	C	C	A	C	A	G	G	?	A	?	?	G	A	C	T	G	T	T	A	G
A1989002	C	G	T	G	A	C	C	G	T	G	A	G	G	A	C	A	T	?	A	T	G	C	T	G	G	G	C	G	C	C	C	A	C	A	G	G	?	A	?	C	G	A	C	T	G	C	T	A	G
A1992002	C	G	T	G	A	C	C	G	T	G	A	G	G	?	C	A	T	?	A	T	G	C	T	G	G	G	C	G	C	C	C	A	C	A	G	G	?	A	?	C	G	A	C	T	G	C	T	A	G
B1959001	C	G	?	G	?	?	?	G	T	G	A	G	G	A	C	A	?	?	A	T	G	C	T	?	G	G	?	G	?	?	C	A	C	A	?	G	?	?	?	C	?	?	C	T	G	C	T	A	G
B1965003	T	G	?	G	A	C	C	?	T	G	A	?	G	A	C	A	T	?	A	T	G	A	T	?	G	?	C	G	?	C	T	A	C	A	?	G	?	A	?	C	G	?	C	T	G	C	T	T	G
B1965004	?	?	T	G	?	?	?	?	?	G	A	G	?	A	?	?	?	?	?	T	?	?	T	G	?	G	?	?	C	?	?	?	C	A	G	?	?	?	?	C	?	A	?	T	?	?	T	?	G
B1971001	C	G	T	G	A	C	C	?	T	G	A	G	G	A	C	A	T	?	A	T	G	C	T	G	G	?	C	G	C	C	C	A	C	A	G	G	?	G	?	C	G	A	C	T	G	C	T	?	G
B1972002	C	G	T	G	A	C	C	G	T	G	A	G	G	A	C	A	T	?	A	T	G	C	T	G	G	G	C	G	C	C	C	A	C	A	G	G	?	G	?	C	G	A	C	T	G	C	T	A	G
B1976002	C	G	T	G	A	C	C	G	T	G	A	G	G	A	C	A	T	?	A	T	G	C	T	G	G	G	?	G	C	C	C	A	C	A	G	G	?	G	?	C	G	A	C	T	G	C	T	A	G
B1976004	C	G	?	G	A	C	C	G	T	G	A	G	G	A	C	A	T	?	A	?	G	C	T	?	G	G	C	G	?	C	C	A	C	?	?	G	?	G	?	C	G	?	C	T	G	C	T	A	G
B1981002	C	G	T	?	A	C	C	G	T	?	A	?	G	A	C	A	T	?	A	T	G	C	?	G	G	G	C	G	C	C	C	A	C	A	G	G	?	G	?	C	G	A	C	T	G	C	?	A	?
B1983005	C	G	T	G	A	C	C	?	T	G	A	G	G	A	C	A	T	?	A	T	G	C	T	G	G	?	C	G	C	C	C	A	C	A	G	G	?	G	?	C	G	A	C	T	G	C	T	T	G
B1984002	C	G	T	G	A	C	C	G	T	G	A	G	G	A	C	A	T	?	A	T	G	C	T	G	G	G	C	G	C	C	C	A	C	A	G	G	?	G	?	C	G	A	C	T	G	C	T	A	G
C1954002	C	G	T	G	A	C	C	G	T	G	A	?	G	A	?	A	T	?	A	T	G	?	?	G	G	G	C	G	C	C	C	?	C	A	G	?	?	A	?	C	G	A	C	T	?	C	?	A	?
C1960003	C	G	T	G	A	C	C	G	T	G	A	G	G	A	C	A	T	?	A	T	G	C	T	G	G	G	C	G	C	C	C	A	C	A	G	G	?	A	?	C	G	A	C	T	G	C	T	A	G
C1960004	C	G	?	G	A	C	C	G	T	G	A	G	G	A	C	A	T	?	A	T	G	C	T	?	G	G	C	G	?	C	C	A	C	A	?	G	?	A	?	C	G	?	C	T	G	C	T	A	G
C1962001	C	G	T	G	A	C	C	G	T	G	A	G	G	A	C	A	T	C	A	T	G	C	T	G	G	G	C	G	C	C	C	A	C	A	G	G	?	A	?	C	G	A	C	T	G	C	T	A	G
C1962002	C	G	T	G	A	C	C	G	T	G	A	G	G	G	C	?	T	?	A	C	G	C	T	G	G	G	C	G	C	C	?	G	C	A	G	G	?	G	?	C	G	A	C	T	G	?	T	A	G
C1970022	?	?	T	?	?	?	?	G	?	?	A	G	?	A	C	?	?	?	?	T	?	C	T	G	?	G	?	?	C	?	?	A	C	A	G	G	?	?	G	C	?	A	?	T	G	?	T	A	G
C1972003	C	G	T	G	A	C	C	?	T	G	A	G	G	A	C	A	T	C	A	T	G	C	T	G	G	?	C	G	C	C	C	A	C	A	G	G	?	A	?	C	G	A	C	T	G	C	T	?	G
C1972004	C	G	T	G	A	C	C	G	T	G	A	G	G	A	C	A	T	?	A	T	G	C	T	G	G	G	C	G	C	C	C	A	C	A	G	G	?	A	?	C	G	A	C	T	G	C	T	A	G
C1975001	C	G	T	G	A	C	C	G	T	G	A	G	G	A	C	A	T	?	A	T	G	C	T	G	G	G	C	G	C	C	C	A	C	A	G	G	?	A	?	C	G	A	C	T	G	C	T	A	G
C1976001	C	G	T	G	A	C	C	G	T	G	A	G	G	A	C	A	T	?	A	T	G	C	T	G	G	G	C	G	C	C	C	A	C	A	G	G	?	A	?	C	G	A	C	T	G	C	T	A	G
C1976002	C	G	T	G	A	C	C	G	T	G	?	G	G	A	C	A	T	?	A	T	G	C	T	G	G	G	C	G	C	C	C	A	?	A	G	G	?	A	?	C	G	A	C	?	G	C	T	A	G
C1976003	C	G	T	?	A	C	C	G	T	?	A	?	G	A	C	A	T	?	A	T	G	C	?	G	G	G	C	G	C	C	C	A	C	A	G	G	?	A	?	C	G	A	C	T	G	C	?	A	?
C1977001	C	G	T	?	A	C	C	G	T	?	A	G	G	?	C	A	T	?	A	T	G	C	T	G	G	G	C	G	C	C	C	A	C	A	G	G	?	A	?	?	G	A	C	T	G	C	T	A	G
C1979001	?	?	T	G	?	?	?	G	?	G	A	G	?	A	C	A	?	?	?	T	?	C	T	G	?	G	?	?	C	?	C	A	C	A	G	G	?	?	?	C	?	A	?	T	G	C	T	A	G
C1980003	C	G	?	G	A	C	C	G	T	G	A	G	G	A	C	A	T	?	A	T	G	C	T	?	G	G	C	G	?	C	C	A	C	A	?	G	?	A	?	C	G	?	C	T	G	C	T	A	G
C1984011	C	G	T	G	A	C	C	G	T	G	A	G	G	A	C	A	T	?	A	T	G	C	T	G	G	G	C	G	C	C	C	A	C	A	G	G	?	A	?	C	G	A	C	T	G	C	T	A	G
C1985002	C	G	T	G	A	C	C	G	T	G	A	G	G	A	C	A	T	?	A	?	G	C	T	G	G	G	C	G	C	C	C	A	C	?	G	G	?	A	?	C	G	A	C	T	G	C	T	A	G
C1985003	C	G	T	?	A	C	C	G	T	?	A	?	G	A	C	A	T	?	A	T	G	C	?	G	G	G	C	G	C	C	C	A	C	A	G	G	?	A	?	C	G	A	C	T	G	C	?	A	?
C1985005	C	G	T	G	A	C	C	G	T	G	?	G	G	A	C	A	T	?	A	T	G	C	T	G	G	G	C	G	C	C	C	A	?	A	G	G	?	A	?	C	G	A	C	?	G	C	T	A	G
C1987002	C	G	T	G	A	C	C	G	T	G	A	G	G	A	C	A	T	?	A	T	G	C	T	G	G	G	C	G	C	C	C	A	C	A	G	G	?	G	?	C	G	A	C	T	G	C	T	A	G
C1989001	C	G	T	?	A	C	C	G	T	?	A	G	G	A	C	A	T	?	A	T	G	C	T	G	G	G	C	G	C	C	C	A	C	A	G	G	?	A	?	C	G	A	C	T	G	C	T	A	G
C1994002	C	G	T	G	A	C	C	G	T	G	A	G	G	A	C	A	T	?	A	?	G	C	T	G	G	G	C	G	C	C	C	A	C	A	G	G	?	A	?	C	G	A	C	T	G	C	T	A	G
C2000001	C	G	T	G	A	C	C	G	T	G	A	G	G	A	C	A	T	?	A	T	G	C	T	G	G	G	C	G	C	C	C	A	C	A	G	G	?	A	?	C	G	A	C	T	G	C	T	A	G
CO92	C	G	T	G	A	C	C	G	T	G	A	G	G	A	C	A	T	?	A	T	G	C	A	G	G	G	C	G	C	C	C	A	C	A	G	G	?	A	?	C	G	A	C	?	G	C	T	A	G
D1964003	C	G	T	G	A	C	C	G	T	G	A	G	G	A	C	A	T	C	A	T	G	C	T	G	G	G	C	G	C	C	C	A	C	A	G	G	?	A	?	C	G	A	C	T	G	C	T	A	G
D1964013	C	G	T	G	A	C	C	G	T	G	?	G	G	A	C	A	T	?	A	T	G	C	T	G	G	G	C	G	C	C	C	A	?	A	G	G	?	A	?	C	G	A	C	?	G	C	T	A	G
D1977001	?	?	T	G	?	?	?	G	?	G	A	G	?	A	C	?	?	?	?	T	?	C	T	G	?	G	?	?	C	?	?	A	C	A	G	G	?	?	?	C	?	A	?	T	G	?	T	A	G
D1982002	C	G	T	G	A	C	C	G	T	G	A	G	G	A	C	?	T	C	A	T	G	C	T	G	G	G	C	G	C	C	?	A	C	A	G	G	?	A	?	C	G	A	C	T	G	?	T	A	G
D1991002	C	G	T	G	A	C	C	G	T	G	?	G	G	?	C	A	T	?	A	T	G	C	T	G	G	G	C	G	C	C	C	A	?	A	G	G	?	A	?	C	G	A	C	?	G	C	T	A	G
D1991003	C	G	T	?	A	C	C	G	T	?	A	G	G	A	C	?	T	?	A	?	G	C	T	G	G	G	C	G	C	C	?	A	C	?	G	G	?	A	?	C	G	A	C	T	G	?	T	A	G
E1954005	C	G	T	G	A	C	C	G	T	G	A	G	G	A	C	?	T	?	A	T	G	C	T	G	G	G	C	G	C	C	?	A	C	A	G	G	?	A	?	?	G	A	C	T	G	?	T	A	G
E1977002	C	G	T	?	A	C	C	G	T	?	A	G	G	A	C	?	T	?	A	T	G	C	T	G	G	G	C	G	C	C	?	A	C	A	G	G	?	A	?	C	G	A	C	T	G	?	T	?	G
E1977003	C	G	?	G	A	C	C	?	T	G	A	G	G	A	C	A	T	?	A	T	G	C	T	?	G	?	C	G	?	C	C	A	C	A	?	G	?	A	?	C	G	?	C	T	G	C	T	A	G
F1946001	C	G	T	G	A	C	C	G	T	G	A	G	G	A	C	A	T	?	A	T	G	C	A	G	G	G	C	G	C	C	C	A	C	A	G	G	?	A	G	C	G	A	C	T	G	C	T	A	G
F1952001	C	G	T	G	A	?	?	G	?	G	A	G	G	A	C	A	T	?	A	T	G	C	T	G	G	G	?	?	C	C	C	A	C	A	G	G	?	?	?	C	G	A	C	T	G	C	T	A	G
F1953005	C	G	?	G	A	T	C	G	T	G	A	G	G	A	C	A	G	?	A	T	G	C	A	?	G	G	C	G	?	C	C	A	C	A	?	G	?	A	?	C	A	?	C	T	G	C	T	A	G
F1954001	?	?	T	G	?	?	?	G	?	G	A	A	?	A	C	A	?	C	?	?	?	C	A	G	?	G	?	?	C	?	C	A	C	A	G	G	?	?	?	C	?	A	?	T	G	C	T	A	G
F1955003	C	G	T	G	A	T	C	?	T	G	A	G	G	A	C	A	G	?	A	T	G	C	A	G	G	?	C	G	C	C	C	A	C	A	G	G	?	A	?	?	A	A	C	T	G	C	T	T	G
F1984002	C	G	T	G	A	C	C	G	T	G	A	G	G	A	C	A	T	?	A	T	G	C	T	G	G	G	C	G	C	C	C	A	C	A	G	G	?	A	?	C	G	A	C	T	G	C	T	A	G
F1984004	C	G	?	G	A	T	C	G	T	G	A	A	G	A	C	A	G	?	A	?	G	C	A	?	G	G	C	G	?	C	C	A	C	?	?	G	?	A	?	C	A	?	C	T	G	C	T	A	G
F2000004	C	G	T	G	A	T	C	G	T	G	A	A	G	A	C	A	G	C	A	T	G	C	A	G	G	G	C	G	C	C	C	A	C	A	G	G	?	A	?	C	A	A	C	T	G	C	T	A	G
F2000005	?	?	T	G	?	?	?	?	?	G	?	A	?	A	C	?	?	?	?	T	?	C	A	G	?	?	?	?	C	?	?	A	?	A	G	G	?	?	?	C	?	A	?	?	G	?	T	?	G
G1966001	T	G	T	G	A	C	C	G	T	G	?	G	G	A	?	A	T	?	A	T	G	?	T	G	G	G	C	G	C	C	T	?	?	A	G	?	?	A	?	C	G	A	C	?	?	C	T	A	G
G1995005	T	G	T	G	A	C	C	?	T	G	?	?	G	?	C	A	T	?	A	T	G	A	?	G	G	?	C	G	C	C	T	A	?	A	G	G	?	A	?	C	G	A	C	?	G	C	?	?	?
G1996002	T	G	T	G	A	C	C	C	T	G	?	G	G	A	?	A	T	C	A	T	G	?	T	G	G	G	C	G	C	C	T	?	?	A	G	?	?	A	?	C	G	A	C	?	?	C	T	A	G
G1996005	?	G	T	?	?	?	?	C	?	?	A	G	?	A	C	A	?	C	A	?	G	A	T	G	G	G	?	?	C	?	T	A	C	?	G	G	?	?	G	C	?	A	C	T	G	C	T	A	G
G1996007	T	G	T	G	A	C	C	C	T	G	?	G	G	A	C	A	T	?	A	T	G	A	T	G	G	G	C	G	C	C	T	A	?	A	G	G	?	A	?	C	G	A	C	?	G	C	T	A	G
G1998001	T	G	T	G	A	C	C	C	T	G	A	G	G	A	C	A	T	?	A	T	G	A	T	G	G	G	C	G	C	C	T	A	C	A	G	G	?	A	?	C	G	A	C	T	G	C	T	A	G
H1948001	T	G	T	?	A	C	C	G	T	?	A	G	G	A	C	A	T	?	A	T	G	A	T	G	G	G	C	G	C	C	T	A	C	A	G	G	?	A	?	C	G	A	C	T	G	C	T	A	G
H1954006	T	G	T	G	A	C	C	G	T	G	A	G	G	A	C	A	T	C	A	T	G	A	T	G	G	?	C	G	C	C	T	A	C	A	G	G	?	A	?	C	G	A	C	T	G	C	T	?	G
H1958003	?	?	T	G	?	?	?	G	?	G	T	G	?	A	C	A	?	?	?	T	?	C	T	G	?	G	?	?	C	?	C	A	C	A	G	G	?	?	G	?	?	A	?	T	G	T	T	A	G
H1959003	T	G	T	?	A	C	C	G	T	?	A	G	G	A	C	A	T	?	A	T	G	A	T	G	G	G	C	G	C	C	T	A	C	A	G	G	?	A	?	C	G	A	C	T	G	C	T	A	G
H1960004	C	G	T	?	A	C	C	G	T	?	A	G	G	G	C	?	T	?	A	?	G	C	T	G	G	G	C	G	C	C	?	G	C	?	G	G	?	G	?	?	G	A	C	T	G	?	T	A	G
I1954003	C	G	T	G	A	C	C	G	T	G	A	G	G	A	C	A	T	?	A	T	G	C	T	G	G	G	C	G	C	C	C	A	C	A	G	G	?	A	?	C	G	A	C	T	G	C	T	A	G
I1957005	C	G	?	G	A	C	C	G	T	G	T	G	G	A	C	A	T	?	A	T	G	C	T	?	G	G	C	G	?	C	C	A	C	A	?	G	?	A	?	?	G	?	C	T	G	T	T	A	G
I1969003	?	?	T	?	?	?	?	G	?	?	?	G	?	A	C	?	?	C	?	T	?	C	T	?	?	G	?	?	C	?	?	A	C	A	G	G	?	?	?	C	?	?	?	T	G	?	T	A	G
I1970017	C	G	T	G	A	C	C	G	T	G	T	?	G	A	C	A	T	?	A	T	G	C	?	G	G	G	C	G	C	C	C	A	C	A	G	G	?	A	?	C	G	A	C	T	G	T	?	A	?
I1970020	T	G	?	?	A	C	C	G	T	?	A	G	G	A	C	A	T	C	A	?	G	A	T	?	G	G	C	G	?	C	T	A	C	?	?	G	?	A	?	C	G	?	C	T	G	C	T	A	G
I1970021	?	?	T	G	?	?	?	G	?	G	T	G	?	A	C	A	?	?	?	T	?	C	T	G	?	G	?	?	C	?	C	A	C	A	G	G	?	?	?	C	?	A	?	T	G	T	T	A	G
I1970025	C	G	T	?	A	?	C	?	T	?	?	G	G	?	?	A	T	?	A	?	G	C	?	G	G	?	C	G	C	C	C	A	C	?	G	G	?	A	?	C	G	?	C	T	G	?	T	?	G
I1972003	?	?	T	G	?	?	?	G	?	G	?	G	?	A	C	A	?	C	?	T	?	C	T	G	?	G	?	?	C	?	C	A	?	A	G	G	?	?	G	C	?	A	?	?	G	T	T	?	G
I1975003	C	G	?	G	A	C	C	G	T	G	T	G	G	A	C	A	T	?	A	T	G	C	T	?	G	G	C	G	?	C	C	A	C	A	?	G	?	A	?	C	G	?	C	T	G	T	T	A	G
I1986005	C	G	T	G	A	C	C	G	T	G	T	G	G	A	C	A	T	?	A	?	G	C	T	G	G	G	C	G	C	C	C	A	C	A	G	G	?	A	?	C	G	A	C	T	G	T	T	A	G
I1987001	C	G	T	G	A	C	C	G	T	G	T	G	G	A	C	A	T	?	A	T	G	C	T	G	G	G	C	G	C	C	C	A	C	A	G	G	?	A	?	C	G	A	C	T	G	T	T	A	G
I1991003	C	G	T	G	A	C	C	?	T	G	T	G	G	A	C	A	T	?	A	T	G	C	T	G	G	?	C	G	C	C	C	A	C	A	G	G	?	A	?	C	G	A	C	T	G	T	T	?	G
I1992005	?	?	T	G	?	?	?	G	?	G	T	G	?	A	C	A	?	C	?	?	?	C	T	G	?	G	?	?	C	?	C	A	C	A	G	G	?	?	?	C	?	A	?	T	G	T	T	A	G
I1997002	C	G	T	G	A	C	C	G	T	G	T	G	G	A	C	A	T	?	A	T	G	C	T	?	G	G	C	G	C	C	C	A	C	A	G	G	?	A	?	?	G	?	C	T	G	T	T	A	G
I1997003	C	G	?	G	A	C	C	?	T	G	T	G	G	A	C	A	T	?	A	T	G	C	T	?	G	?	C	G	?	C	C	A	C	A	?	G	?	A	?	C	G	?	C	T	G	T	T	?	G
I1998003	C	G	T	?	A	C	C	?	T	?	T	G	G	A	C	A	T	?	A	T	G	C	T	G	G	?	C	G	C	C	C	A	C	A	G	G	?	A	?	C	G	A	C	T	G	T	T	A	G
I2001013	C	G	T	G	A	C	C	G	T	G	T	G	G	A	C	A	T	C	A	?	G	C	T	G	G	G	C	G	C	C	C	A	C	?	G	G	?	A	?	C	G	A	C	T	G	T	T	A	G
J1962002	C	G	?	G	A	C	C	G	T	G	T	G	G	A	C	A	T	C	A	T	G	C	T	?	G	G	C	G	?	C	C	A	C	A	?	G	?	A	?	C	G	?	C	T	G	T	T	A	G
J1963004	C	G	T	G	A	C	C	G	T	G	T	G	G	A	C	A	T	?	A	T	G	C	T	G	G	G	C	G	C	C	C	A	C	A	G	G	?	A	?	C	G	A	C	T	G	T	T	A	G
J1971004	C	G	T	G	A	C	C	G	T	G	T	G	G	A	C	A	T	C	A	T	G	C	T	G	G	G	C	G	C	C	C	A	C	A	G	G	?	A	?	C	G	A	C	T	G	T	T	A	G
J1977003	C	G	T	G	A	C	C	G	T	G	T	G	G	A	C	A	T	?	A	T	G	C	T	G	G	G	C	G	C	C	C	A	C	A	G	G	?	A	?	C	G	A	C	T	G	T	T	A	G
J1977006	C	G	T	G	A	C	C	G	T	G	T	G	G	A	C	A	T	?	A	T	G	C	T	G	G	G	C	G	C	C	C	A	C	A	G	G	?	A	?	C	G	A	C	T	G	T	T	A	G
J1978002	C	A	T	?	A	C	C	G	T	?	A	G	G	A	C	A	T	?	A	T	G	C	A	G	G	G	C	G	C	C	C	A	C	A	G	G	?	A	?	C	G	A	C	T	G	C	T	A	G
J1994008	C	G	T	G	A	C	C	G	T	G	T	G	G	A	C	A	T	?	A	T	G	C	T	G	G	G	C	G	C	C	C	A	C	A	G	G	?	A	?	C	G	A	C	T	G	T	T	A	G
K1972004	C	G	?	?	A	C	C	G	T	?	?	?	G	A	T	A	T	?	A	T	G	C	?	?	G	G	C	G	?	C	C	A	?	A	?	G	?	A	?	C	G	?	C	?	G	T	?	A	?
K1973001	?	?	T	G	?	?	?	?	?	G	T	?	?	A	?	A	?	?	?	T	?	?	?	G	?	?	?	?	C	?	C	?	C	A	G	?	?	?	?	C	?	A	?	T	?	T	?	A	?
K1973003	C	G	T	G	A	C	C	G	T	G	T	?	G	A	T	A	T	?	A	T	G	C	?	G	G	G	C	G	C	C	C	A	C	A	G	G	?	A	?	C	G	A	C	T	G	T	?	A	?
L1970002	C	G	T	A	A	C	A	G	T	G	A	G	G	A	C	A	T	?	A	C	G	C	T	T	G	G	T	G	A	C	C	G	C	A	G	G	?	G	?	?	G	A	C	T	G	C	T	A	G
L1970009	C	G	?	A	A	C	A	G	T	G	A	G	G	A	C	A	T	?	A	C	G	C	T	?	G	G	T	G	?	C	C	G	C	A	?	G	?	G	?	T	G	?	C	T	G	C	T	A	G
L1970015	C	G	?	A	?	?	?	G	T	G	A	G	G	A	C	A	?	?	?	?	G	C	T	?	G	G	T	G	?	?	C	G	C	A	?	G	?	?	?	T	?	?	C	T	G	C	T	A	G
M1987002	C	G	T	A	A	C	A	G	T	G	A	G	G	A	C	A	T	?	A	C	G	C	T	T	G	G	C	G	A	C	C	G	C	A	G	G	?	G	?	T	G	A	C	T	G	C	T	A	G
M1997005	?	?	T	A	?	?	?	G	?	G	?	G	?	A	C	A	?	?	?	?	?	C	T	T	?	G	?	?	A	?	C	G	C	?	G	G	?	?	?	T	?	A	?	T	G	C	T	A	G
M2001009	C	G	T	A	A	C	A	?	T	G	A	?	G	A	?	A	T	?	A	C	G	?	?	T	G	?	C	G	A	C	C	?	C	A	G	?	?	G	?	T	G	A	C	T	?	C	?	?	?
M2001010	C	G	T	A	A	C	A	?	T	G	A	G	G	A	C	A	T	?	A	?	G	C	T	T	G	?	C	G	A	C	C	G	C	A	G	G	?	G	?	T	G	A	C	T	G	C	T	?	G
PEST-F	?	?	T	?	?	?	?	G	?	?	?	?	?	G	C	?	?	?	?	C	?	C	?	G	?	C	?	?	C	?	?	G	?	A	G	T	?	?	?	C	?	A	?	?	G	?	?	T	?
No. ambiguous bases	33	32	35	34	38	40	39	31	35	35	33	23	35	17	19	27	38	234	34	35	32	19	24	45	32	30	39	35	34	36	30	19	30	21	34	19	290	39	266	16	36	37	32	31	20	28	23	34	21
[truncated: 261 more columns]
